# Supplementary material for: Liriodendron genome sheds light on angiosperm phylogeny and species–pair differentiation
Source: PubMed Central journal article supplement (PMC6784881; doi:10.1038/s41477-018-0323-6), 2018-12-17
Supplement: 41477_2018_323_MOESM1_ESM.pdf [file 41477_2018_323_MOESM1_ESM.pdf]

In the format provided by the authors and unedited.

# *Liriodendron* genome sheds light on angiosperm phylogeny and species–pair differentiation

Jinhui Chen <sup>1,11\*</sup>, Zhaodong Hao <sup>1,11</sup>, Xuanmin Guang<sup>2,11</sup>, Chenxi Zhao<sup>2,11</sup>, Pengkai Wang<sup>1</sup>, Liangjiao Xue <sup>1,3</sup>, Qihui Zhu<sup>4</sup>, Linfeng Yang<sup>2</sup>, Yu Sheng<sup>1</sup>, Yanwei Zhou<sup>1</sup>, Haibin Xu<sup>5</sup>, Hongqing Xie<sup>2</sup>, Xiaofei Long<sup>1</sup>, Jin Zhang<sup>6</sup>, Zhangrong Wang<sup>1</sup>, Mingming Shi<sup>2</sup>, Ye Lu<sup>1</sup>, Siqin Liu<sup>1</sup>, Lanhua Guan<sup>7</sup>, Qianhua Zhu<sup>2</sup>, Liming Yang<sup>5</sup>, Song Ge<sup>8</sup>, Tielong Cheng<sup>5</sup>, Thomas Laux <sup>9</sup>, Qiang Gao<sup>2</sup>, Ye Peng<sup>5</sup>, Na Liu <sup>2\*</sup>, Sihai Yang <sup>10\*</sup> and Jisen Shi <sup>1\*</sup>

---

<sup>1</sup>Key Laboratory of Forest Genetics and Biotechnology, Ministry of Education of China, Co-Innovation Center for the Sustainable Forestry in Southern China, Nanjing Forestry University, Nanjing, China. <sup>2</sup>BGI Genomics, BGI-Shenzhen, Shenzhen, China. <sup>3</sup>Warnell School of Forestry and Natural Resources, University of Georgia, Athens, GA, USA. <sup>4</sup>The Jackson Laboratory for Genomic Medicine, Farmington, CT, USA. <sup>5</sup>College of Biology and the Environment, Nanjing Forestry University, Nanjing, China. <sup>6</sup>Department of Surgical and Radiological Sciences, Schools of Veterinary Medicine and Medicine, University of California, Davis, Davis, CA, USA. <sup>7</sup>General Station of Forest Seedlings of Hubei Provincial Forestry Department, Wuhan, China. <sup>8</sup>Institute of Botany, Chinese Academy of Sciences, Beijing, China. <sup>9</sup>BIOSS Centre for Biological Signalling Studies, Faculty of Biology, Albert-Ludwigs-Universität Freiburg, Freiburg, Germany. <sup>10</sup>State Key Laboratory of Pharmaceutical Biotechnology, School of Life Sciences, Nanjing University, Nanjing, China. <sup>11</sup>These authors contributed equally: Jinhui Chen, Zhaodong Hao, Xuanmin Guang, Chenxi Zhao. \*e-mail: [chenjh@njfu.edu.cn](mailto:chenjh@njfu.edu.cn); [naliu@bgi.com](mailto:naliu@bgi.com); [sihaiyang@nju.edu.cn](mailto:sihaiyang@nju.edu.cn); [jshi@njfu.edu.cn](mailto:jshi@njfu.edu.cn)

# 1 **Supplementary Note**

## 2 **1. Genome sequencing and assembly**

### 3 **1.1 Plant materials and DNA preparation**

4 An adult plant *L. chinense* grown in Lushan located in Jiangxi province of China was  
5 used for genome sequencing. For Illumina sequencing, fresh leaves were harvested and  
6 frozen immediately in liquid nitrogen for extracting genomic DNA by using a modified  
7 CTAB protocol<sup>1</sup>. We ran a DNA quality check on gel electrophoresis using agarose gels  
8 (0.3% agarose) for 24h at 30V. In addition, DNA purity was verified by NanoDrop<sup>TM</sup>  
9 Spectrophotometers ND-2000 (Thermo Fisher Scientific, Waltham, MA, USA). For  
10 Pacbio sequencing, DNA was extracted following the Mayjonade pipeline<sup>2</sup>.

11

### 12 **1.2 Whole genome sequencing**

13 Whole genome sequencing for the *L. chinense de novo* genome was generated at  
14 Beijing Genome Institute, Shenzhen (BGI-Shenzhen, China). For Illumina sequencing,  
15 four paired-end libraries with insert sizes of 170, 250, 500 and 800 bp were constructed  
16 and sequenced (Supplementary Table 1). All libraries were constructed according to the  
17 manufacturer's instructions (Illumina). The quality of each library was validated using  
18 Qubit®, AGE. A total of 367.41 Gb raw data were generated using Illumina platforms,  
19 i.e., HiSeq 2000 (Supplementary Table 1). In addition, the *Liriodendron* genome was  
20 sequenced using 33 SMRT Cells with P6/C4 chemistry, resulting in a total of 147.89  
21 Gb raw data with minimum subread length > 2kb (Supplementary Table 2). And, we  
22 also generated a total of 315.41Gb Bionano optical maps for further improvement of



23 the contiguity of the *Liriodendron* genome assembly (Supplementary Table 3). All  
24 sequence data have been deposited in the NCBI Sequence Read Archive under project  
25 PRJNA418360.

26

### 27 **1.3 Raw data processing in Illumina data**

28 Low quality reads were filtered out and potential sequencing errors were removed or  
29 corrected by *k*-mer frequency methodology. The following filtering criteria were  
30 applied to reduce effects of sequencing errors on the assembly, thereby ensuring high  
31 quality reads.

- 32 1) Reads with ambiguous bases (represented by the letter N) or poly-A structures.
- 33 2) Reads with  $\geq 40\%$  low-quality bases (base quality  $\leq 7$ ) in small insert size  
34 libraries (170, 250, 500, and 800 bp).
- 35 3) Reads with adapter contamination: reads with  $\geq 10$  bp aligned to the adapter  
36 sequence ( $\leq 3$  bp mismatch allowed) were filtered out.
- 37 4) Small insert size reads in which read1 and read2 overlapped by  $\geq 10$  bp (10%  
38 mismatch allowed).
- 39 5) PCR duplications (reads were considered duplicates when read1 and read2 of  
40 the two paired-end reads were identical).

41 Low quality and duplicated reads were filtered out, 327.11 Gb of the *L. chinense*  
42 genome was retained for the coming assembly (Supplementary Table 1).

43

### 44 **1.4 Genome size and heterozygosity estimation**

45 A  $k$ -mer refers to an artificial sequence division of  $K$  nucleotides iteratively from  
46 sequencing reads. A raw sequence read with  $L$  bp contains  $(L - K + 1)$   $k$ -mers, if the  
47 length of each  $k$ -mer is  $K$  bp. The frequency of each  $k$ -mer can be calculated from  
48 genome sequence reads. Frequencies of a  $k$ -mer along the sequence depth gradient  
49 follow a Poisson distribution in a given dataset, except for a higher representation of  
50 low frequencies due to sequencing errors, as sequencing errors affect the number of  $k$ -  
51 mers that may be orphan among all splitting  $k$ -mers. The genome size ( $G$ ) is defined as  
52  $G = K\_num/K\_depth$ , where the  $K\_num$  is the total number of  $k$ -mers, and  $K\_depth$  is  
53 the frequency occurring more frequently than other frequencies. In this research, we  
54 used  $K = 17$  to estimate genomes size and a  $K\_num$  value of 4,210,050,595. By plotting  
55 the occurrence of  $k$ -mers against the percentage of corresponding  $k$ -mers, we found that  
56 the peak depth was 24. Our results suggested that the *L. chinense* genome was  
57 approximately 1,750 Mbp (Supplementary Table 4).

58 In addition to the primary peak observed from the distribution of  $k$ -mer occurrence, we  
59 also noted that there was a secondary peak at approximately half of the major depth.  
60 This secondary peak reflected heterozygous regions of the *Liriodendron* genome, since  
61  $k$ -mers of two separate alleles in heterozygous regions are not identical. As a  
62 consequence,  $k$ -mers mapping to the secondary peak are expected to have just half of  
63 the average sequencing depth of the primary peak. This secondary peak corresponds to  
64 a peak depth of 12 and simulated results show a 1.3% heterozygosity (Supplementary  
65 Fig. 1).

66

## 67        **1.5 Genome size estimation using flow cytometry**

68    For genome size estimation using flow cytometry, ‘Two-step’ Method with ‘Cystain PI  
69    absolute P’ buffer from sysmex Partec (art. Nr.: 05-5502) was used. In short, young  
70    leaves of this *L. chinense* individual used for the whole genome sequencing together  
71    with young leaves of *Vinca major* were first "chopped" with a sharp razor blade in  
72    500µl Extraction Buffer (ice-cold), in a plastic petri disc. After 30-60 seconds of  
73    incubation, 2.0 ml Staining Buffer is added. This buffer contains Propidium Iodide (PI)  
74    as fluorescent dye and RNA-se. To the buffer is also added 0,1% DTT (Dithiothreitol)  
75    and 1% Polyvinylpyrrolidone. The chopped solution, containing cell constituents and  
76    large tissue remnants, is passed through a nylon filter of 50 µm mesh size. After  
77    incubation of at least 30 minutes at room temperature, the filtered solution with stained  
78    nuclei is sent through the flow cytometer CyFlow (Sysmex Partec GmbH). At least  
79    3000 nuclei of the sample and the internal standard (*Vinca major*) were measured. The  
80    fluorescence of the stained nuclei, passing through the focus of the light beam of a 50  
81    mW, 532 nm green laser, is measured by a photomultiplier and converted into voltage  
82    pulses. These voltage pulses are electronically processed to yield integral and peak  
83    signals and have been processed by a computer. Finally, the DNA content of this *L.*  
84    *chinense* individual used in genome sequencing is 3.7 pg/2c, which means that the  
85    genome size of this individual plant is estimated to be ~1,809 Mb<sup>3</sup>.

86

## 87        **1.6 De novo genome assembly**

88    The *Liriodendron* genome was *de novo* assembled using FALCON

89 (<https://github.com/PacificBiosciences/FALCON>) based on PacBio long reads (only  
90 reads longer than 10 kb were corrected and assembled, the daligner's option: -D24 -t30  
91 -h480 -e.75 -w8 -l3000 -s1000 -k18). Errors in the PacBio reads were corrected within  
92 the FALCON pipeline. The assembled genome was firstly polished by Arrow which is  
93 from SMRT Link v5.0.0 based on raw PacBio data (--minConfidence 40 --  
94 minCoverage 5) and then paired-end Illumina reads of short-insert libraries (170bp, 250  
95 bp, 500 bp and 800bp) were aligned to the assembly by BWA-mem v0.7.17 for a Pilon  
96 v1.21 correction<sup>4</sup> to improve assembly with these aligned results. Hybrid scaffolds with  
97 assembled contigs and optical genome maps were created by Bionano Access pipeline  
98 (<https://bionanogenomics.com/support-page/bionano-access/>) using merge P-value of  
99  $1 \times 10^{-10}$  and alignment length of 60 bp. Based on the super-scaffolds, we utilized  
100 PBJelly v15.8.24<sup>5</sup> to do gap filling with the PacBio reads which corrected by Falcon  
101 before with the option '<blasr>-minMatch 8 -minPctIdentity 75 -bestn 1 -nCandidates  
102 20 -maxScore -500 -nproc 4 -noSplitSubreads</blasr>' for protocol file. This Whole  
103 Genome Shotgun project has also been deposited under the same BioProject with an  
104 accession number PRJNA418360.

105

### 106 **1.7 Linkage map construction**

107 A total of 150 F1 seedlings, segregating from a single cross using the parents 'Lushan'  
108 and 'NK', was used to construct the linkage map. These two parent individuals are  
109 planted in the Xiashu Tree Farm, Jiangsu, China, and the female parent 'Lushan'  
110 originated from Lushan, Jiangxi, China and the male parent 'NK' originated from South

111 California, USA. These 150 F1 seedlings are planted in Hubei, China. Linkage analysis  
112 was implemented by using JoinMap 4.0<sup>6</sup>. In the first step, RAD-based SNP markers  
113 were selected according to the expected segregation ratio, such as two heterozygous  
114 SNP markers between two parents were expected to segregate at a 1:2:1 ratio, and one  
115 heterozygous and one homozygous SNP allele between two parents were expected to  
116 segregate at a 1:1 ratio. Subsequently, Distorted markers (Po0.01) were filtered to  
117 construct a genetic map by using a chi-square test. Finally, the candidate markers were  
118 divided into 19 linkage groups (Supplementary Fig. 2). Then, reads that contained SNP  
119 markers were aligned to the scaffolds. All these SNP markers were used to construct  
120 the linkage map with the CP population model in JoinMap (Supplementary Table 6).

121

## 122 **1.8 Construction of BAC libraries**

123 Nuclei were isolated from 200 grams of etiolated young leaves as described as by  
124 Peterson *et al.*<sup>7</sup> and Zhang *et al.*<sup>8</sup>. High molecular weight (HMW) DNA was released  
125 from nuclei by proteinase K in lysis buffer (0.1 mg/mL Proteinase K dissolved in 0.5M  
126 EDTA, PH = 9.1) at 50 °C for 48 hours. Lysis buffer was exchanged after 24 hours  
127 during a 48-hour period. Plugs (usually containing 5-6 µg undigested HMW DNA)  
128 were partially digested with BamHI or HindIII. After digestion, size selection was first  
129 carried out by PFGE separation for 16 h with a setting of 6 V/cm, pulse time 1-40 s,  
130 12.5 °C, angle 120 °, then for 16 h with a setting of 6 V/cm, pulse time 3-5 s, 12.5 °C,  
131 angle 120 ° in 0.25× TBE buffer. We harvested agarose gels, containing DNA  
132 fragments with a size range of 200 to 400 kb, and performed DNA elution with 350-

133 450  $\mu$ l 1 $\times$  TAE buffer using a Bio-Rad model 422 Electro-Eluter (Bio-Rad, USA).  
134 Eluted DNA was ligated into pIndigoBAC-5 vectors (Epicentre, USA). The mol ratio  
135 of vector to insert DNA was 10:1. The ligation products were introduced into  
136 ElectroMAX<sup>TM</sup> DH10BTM cells (Invitrogen, USA) via the Gene Pulser Xcell<sup>TM</sup>  
137 Total System (Bio-Rad, USA) at 1.7 kV/cm, 200  $\Omega$  with a 0.1 cm cuvette (Bio-Rad,  
138 USA). Transformed cells were spread on LB Petri plates containing 12.5  $\mu$ g $\cdot$ mL<sup>-1</sup>  
139 chloramphenicol, 0.55 M IPTG and 80  $\mu$ g X-GAL/ml<sup>9</sup>. White clones were picked with  
140 sterile toothpicks manually and arranged in 384-well plates, which were then filled with  
141 80  $\mu$ l ice-cold LB media containing 12.5  $\mu$ g $\cdot$ mL<sup>-1</sup> chloramphenicol. All 384-well plates  
142 were incubated at 37  $^{\circ}$ C overnight until the media became muddy cloudy. Clones in  
143 384-well plates were kept in -80  $^{\circ}$ C.

144

### 145 **1.9 Genome assembly assessment**

146 We used a 500-bp sliding window to calculate GC content and average sequencing  
147 depth using the *L. chinense* genome assembly as a reference. Usually, genomic regions  
148 with high or low GC content will possess a low sequencing depth compared to a median  
149 GC content region. Our results indicated there were no obvious sequence biases or  
150 contaminations. To assess the integrity of the *L. chinense* assembly, we aligned about  
151 70 $\times$  (i.e.  $\sim$ 119 Gb) paired-end reads from the 170 bp genomic libraries onto the *L.*  
152 *chinense* assembly using SOAPdenovo v2.04 with the parameters set to “-m 127 -x 190  
153 -v 5 -l 32 -s 40”, resulting in a mapping rates of 88.78%.

154 We also assessed the genome assembly by using BAC sequencing. Those 89 BAC  
155 sequences were mapped back to the assembled reference genome by BLASTN with an  
156 E-value of 1e-5. Subsequently, solar was utilized to conjoin fragmental alignments for  
157 each BAC alignment result. We found that 99.75% of the BAC sequences were covered  
158 without any obvious misassemblies (Supplementary Fig. 4).

159 A total of 14 Mb PE RNA-Seq reads from Hiseq 2000 sequencing libraries,  
160 representing expressed sequences from 4 different *L. chinense* tissues (i.e., sepal, bud,  
161 stamen and stigma), was assembled with Trinity v2.4.0<sup>10</sup>. All assembled unigenes were  
162 further used for evaluating the completeness of the *L. chinense* genome assembly based  
163 on BLAT v35 with default parameters. These results showed that the assembly covered  
164 99.78% of the 66,934 unigenes and 91.89% of these unigenes could be mapped to the  
165 assembly with >90% sequence in one scaffold (Supplementary Table 8).

166 The 1440 conserved plant genes from the BUSCOs<sup>11</sup> database were also mapped back  
167 to the genome assembly by BLAT to calculate the gene region; 1,300 (90.28%)  
168 conserved plant genes could be found in the assembled genome. (Supplementary Table  
169 9).

170

## 171 **1. Genome annotation**

### 172 **1.1 Repeat annotation**

173 Genome annotation was performed based on the genome version PVNU01000000. We  
174 identified tandem repeats and transposable elements (TEs) separately. Tandem repeats  
175 were predicted using Tandem Repeats Finder 4.04<sup>12</sup> with the following parameters:

176 “Match = 2, Mismatch = 7, Delta = 7, PM = 80, PI = 10, Minscore = 50, and MaxPeriod  
177 = 2000”.

178 TEs were identified in the genome using a combination of homology-based and *de novo*  
179 approaches. For the homology based approach, we first identified known TEs using  
180 RepeatMasker against the Repbase 16.10<sup>13</sup> database of known repeat sequences, and  
181 then used RepeatProteinMask, implemented in RepeatMasker, to identify TEs by  
182 aligning the genome sequence to the TE protein database. For the *de novo* approach,  
183 we constructed a repeat library generated by RepeatModeler v1.0.11<sup>14</sup> with default  
184 parameters, obtaining consensus sequences and classification information for each  
185 repeat family. Then RepeatMasker was run on the genome sequences, using the  
186 RepeatModeler consensus sequence as the library.

187 Finally, all repeat sequences identified by the different methods were combined into the  
188 final repeat annotation (Supplementary Tables 10-12).

189

## 190 **1.2 Gene prediction**

191 Gene model prediction was conducted by the MAKER pipeline (version 2.31.10)<sup>15</sup>,  
192 integrating *ab initio* prediction with *de novo* assembled transcripts from short-read  
193 mRNA sequencing, isoform-sequencing full-length transcripts, and protein homology  
194 data. A high-confidence gene model was conducted by further removing transposons  
195 and low-confidence predictions.

196

## 197 **1.3 Gene annotation**



198 Gene functionality was predicted based on the best match derived from alignments to  
199 proteins annotated in SwissProt and TrEMBL databases<sup>16</sup> using blastp v2.3.0<sup>17</sup> (E-value  
200  $\leq 10^{-5}$ ). Motifs and domains were annotated using InterProScan<sup>18</sup> by searching against  
201 publicly available protein databases, including Pfam<sup>19</sup>, PRINTS<sup>20</sup>, PROSITE<sup>21</sup>,  
202 ProDom<sup>22</sup>, and SMART<sup>23</sup>. Descriptions of gene products, i.e., Gene Ontology (GO)  
203 terms, were retrieved from the corresponding InterPro entries. We also mapped the  
204 *Liriodendron* reference genes to KEGG<sup>24</sup> pathway maps by searching KEGG databases  
205 and finding the best hit for each gene. Finally, 29,482 genes (83.59% of all predicted  
206 genes) were functionally annotated and the remaining 5,787 genes, with no functional  
207 annotation, were labeled “hypothetical proteins” (Supplementary Table 7).

208

#### 209 **1.4 ncRNA annotation**

210 A non-coding RNA (ncRNA) is any RNA molecule that is not translated into a protein.  
211 Here, four types of non-coding RNAs (ncRNAs), including micro RNAs (miRNAs),  
212 transfer RNAs (tRNAs), ribosomal RNAs (rRNAs), and small nuclear RNAs (snRNAs),  
213 were annotated. tRNA genes were predicted based on tRNAscan-SE v1.3.1<sup>25</sup> with  
214 parameters chosen for eukaryotes. If more than 80% of the length of a tRNA gene was  
215 covered by SINE TEs, then it was defined as SINE masked. rRNA fragments were  
216 identified by aligning human’s rRNA sequences to the *Liriodendron* genome by using  
217 BLASTN<sup>17</sup> with a parameter of E value  $\leq 1e^{-5}$ , identity  $\geq 85\%$  and matched length  
218  $\geq 50$ bp. miRNA and snRNA genes were detected by using INFERNAL<sup>26</sup> software

219 (version 1.1.2) against the Rfam database<sup>27</sup> (Release 9.1), with Rfam's family-specific  
220 "gathering" cutoff.

221

## 222 **2. Genome evolution**

### 223 **2.1 Whole genome duplication**

224 To identify syntenic blocks, protein sequences from *L. chinense* and grape were first  
225 blasted against themselves using BLASTP<sup>17</sup>. Then these results were subjected to  
226 MCscan v0.8<sup>28</sup> to determine syntenic blocks, defining five genes as being required to  
227 define a synteny block. We then calculated the 4DTv (fourfold degenerate synonymous  
228 sites of the third codon) for syntenic segments from the concatenated alignments,  
229 constructed by fourfold degenerate sites of all gene pairs found in each segment, and  
230 plotted the distribution of the 4DTv values. One peak around 0.25 was observed in the  
231 *L. chinense* genome (Supplementary Fig. 8). An all-against-all comparison based on  
232 protein sequences was performed on *L. chinense* using BLASTP 2.2.29<sup>17</sup> with an E  
233 value of 10<sup>-5</sup>. Then alignments were further filtered to retain pairs for which the shorter  
234 sequence was at least 50% of the longer sequence, and the alignment was at least 50%  
235 of the shorter sequence. If one sequence had multiple matches meeting the cut-offs,  
236 these were grouped into a paralogue group, including any other genes that were  
237 associated with these matches. Next, all possible pairs of protein sequences within each  
238 group were aligned using MUSCLE 3.8.31<sup>29</sup> with default parameters. A nucleotide  
239 alignment was generated from the protein alignment using a Python script.  
240 Synonymous substitutions were estimated using the codeml program from PAML 4.8<sup>30</sup>.

241 The  $K_s$  scores within each group were then corrected to remove redundant values; only  
242 those representing duplication events within the group were retained (in a group of  $n$   
243 genes, there are  $n - 1$  possible duplication events) using the method described in  
244 previous studies<sup>31,32</sup>. Moreover, another  $K_s$  method which was development by Maere  
245 *et al.*<sup>33</sup> was used to interpret the results. Based on the previously obtained blast results,  
246 some pairs were filter based on an E value cutoff of e-10, after which gene families  
247 were built with the OrthoMCL version 5<sup>34</sup>. Each gene family was aligned by PRANK<sup>35</sup>,  
248 and  $K_s$  were estimated for all pairwise comparisons within a gene family by the  
249 CODEML program of the PAML package<sup>30</sup>. Gene families were then subdivided into  
250 subfamilies for which  $K_s$  estimates between members did not exceed a value of 5. To  
251 correct for the redundancy of  $K_s$  values (a gene family of  $n$  members produces  $n(n-$   
252  $1)/2$  pairwise  $K_s$  estimates for  $n-1$  retained duplication events), for each subfamily a  
253 phylogenetic tree was constructed using PhyML 3.0<sup>36</sup> under default settings.  
254 Subsequently, each tree was rooted by treebest. For each duplication node in the  
255 resulting phylogenetic tree, all  $m$   $K_s$  estimates between the two child clades were added  
256 to the  $K_s$  distribution with a weight of  $1/m$ , so that the weights of all  $K_s$  estimates for a  
257 single duplication event sum up to one. The  $K_s$ -based relative age distributions were  
258 constructed for both of the genome (Fig 1a) and transcriptome (Fig 1b).

259

## 260 **2.2 LTR insertion**

261 Based on the repeat annotation, we counted the content and distribution of TEs in the  
262 *Liriodendron* genome using R program. Among the TEs, long terminal repeats (LTRs)

263 were the most abundant and occupied 56.25% of the genome, while DNA transposons  
264 occupied 5.81% and long interspersed nuclear elements (LINEs) occupied 1.70%  
265 (Supplementary Table 11). Within LTRs, the *Gypsy* superfamily was more abundant  
266 than the *Copia* superfamily (Supplementary Table 12 and Supplementary Fig. 9). In  
267 addition, TEs within the *Liriodendron* genome are located in four regions: the  
268 intergenic regions (84.71%), gene regions (13.93%), Proximal promoter (with less than  
269 3,000 bp from its adjacent gene 5' end, 0.73%) and Proximal 3' end (with less than  
270 3,000 bp from its adjacent gene 3' end, 0.64%) (Supplementary Fig. 10).

271 As the genome size of *L. chinense* is about 1.7G, we investigated the effect of  
272 genome expansion on LTR presence (Supplementary Fig. 13). All the LTRs sequences  
273 were identified with complete 5'LTR and 3'LTR by the LTR-STRUC program under  
274 the default p. Each of the 5' LTR flank sequences and 3' flank sequences were aligned  
275 by MUSCLE<sup>29</sup>. Then, the distance of the alignment sequences was calculated by the  
276 disMat. The insert time was calculated using the following formula:  $T=K/2r$ . Assuming  
277 an intergenic nucleotide substitution rate that was roughly twice as slow in genic  
278 regions, a substitution rate of  $1.51 \times 10^{-9}$  per site per year was used to convert LTR  
279 sequence divergence values into the estimated insertion time.

280

### 281 **3. Genome phylogeny**

#### 282 **3.1 orthologue identification**

283 Ortholog groups (OGs) were constructed using 17 other land plants: six eudicots  
284 (*Arabidopsis thaliana*, *Populus trichocarpa*, *Vitis vinifera*, *Coffea canephora*, *Ipomoea*

285 *nil* and *Fraxinus excelsior*); six monocots (*Brachypodium distachyon*, *Xerophyta*  
286 *viscosa*, *Asparagus officinalis*, *Musa acuminata*, *Ananas comosus* and *Oryza sativa*);  
287 three magnoliids (*Magnolia Grandiflora*, *Michelia alba* and *Persea americana*); one  
288 basal angiosperm (*Amborella trichopoda*); and one gymnosperm (*Gnetum montanum*)  
289 by using the software OrthoFinder v2.2.3<sup>37</sup>. Most of these plant species have genome  
290 data except for three magnoliids plants in which transcriptome data were used in this  
291 study. Among these three magnoliids, *Magnolia Grandiflora*, *Michelia alba* and *Persea*  
292 *americana*, the first two were sequenced in this study and the last one was available in  
293 Ibarra-Laclette *et al.*<sup>38</sup>. To obtain as many genes as possible, we sequenced the mixed  
294 tissues comprised of flowers, stems and leaves in both two Magnoliaceae plants and  
295 the resting Lauraceae plant we selected was also sequenced based on mixed tissues  
296 comprised of seeds, roots, stems, leaves, aerial buds and flowers<sup>38</sup>. The final numbers  
297 of available protein sequences of these three magnoliids, *Magnolia Grandiflora*,  
298 *Michelia alba* and *Persea americana*, were 33,943, 34,672 and 46,351, respectively.  
299 First, we performed OG construction using OrthoFinder<sup>37</sup>. Then, we selected low-copy  
300 OGs with the number of putative orthologues less than two in each species and putative  
301 orthologues were found in at least four eudicots, four monocots, three magnoliids, one  
302 basal angiosperm and one gymnosperm.  
303 After that, a total of 1,163 low-copy OGs were separately aligned using Clustal Omega  
304 v1.2.4<sup>39</sup> and all alignments were further trimmed by using TrimAl 1.2<sup>40</sup>. Next, we  
305 constructed 1,163 single-gene trees by using RAxML v8.2.11<sup>41</sup> with the  
306 PROTCATWAG mode. Finally, we rooted each OG tree using *Gnetum montanum* and

307 compared these single-gene trees with the species tree (Supplementary Fig. 14) after  
308 masking all magnoliids. Due to the limited number of informative sites in one gene, it  
309 was hard to use a single-gene tree to resolve the relationship among the low-level  
310 taxonomic hierarchies. Therefore, we selected the OGs with genes that, as they should,  
311 formed a monophyletic gene clade within species of a monophyletic organismal group  
312 (that is, eudicots and monocots) and the only one basal angiosperm, *Amborella*, was  
313 sister to the clade of monocots and eudicots. After that, we unmasked all magnoliids  
314 plants and excluded OGs with different magnoliids plants clustered with different  
315 clades, that is eudicots, monocots and the clade of monocots and eudicots. In other  
316 words, we only selected OGs with all magnoliids plants clustered with the same clade  
317 (see examples in Supplementary Fig. 15), ultimately resulting in 502 low-copy OGs.  
318 Finally, we classified these OGs according to which clade the magnoliids clustered with  
319 into a sister group, ultimately resulting in three alternative topologies.

320

### 321 **3.2 Phylogenetic signal quantification**

322 We calculated phylogenetic signal as described in Sheng *et al.*<sup>42</sup>. Simply, we first  
323 calculated the site-wise log-likelihood scores for the ML tree constrained to three  
324 alternative topologies. Then, we calculated the difference in site-wise log-likelihood  
325 scores ( $\Delta$ SLS) between these three alternative topologies for every site. Next, by  
326 summing the  $\Delta$ SLS scores of all sites, we could obtain the difference in gene-wise log-  
327 likelihood scores ( $\Delta$ GLS) between three alternative topological hypotheses. After that,  
328 we could quantify the distribution of phylogenetic signal for these three alternative

329 phylogenetic topologies at the gene level, that is, we could count the number of genes  
330 supporting for each alternative topology. Among the 506 low-copy OGs, 166 supported  
331 the topology I, 167 supported the topology II and the final 169 OGs supported the  
332 topology III with no statistically significant difference (Supplementary Fig. 16).

333 In addition, we also excluded the OGs with  $\Delta$ GLS values being outlier. The outlier  
334  $\Delta$ GLS values were well defined<sup>31</sup> and we calculated the upper whisker and the lower  
335 whisker and excluded the OGs with absolute  $\Delta$ GLS values greater than the upper  
336 whisker or smaller than the lower whisker, resulting in 481 low-copy OGs with 157  
337 OGs supporting topology I, 159 OGs supporting topology II and the final 165 OGs  
338 supporting topology III (Fig. 2b), showing an equal distribution of phylogenetic signal  
339 for each topology at gene level.

340

### 341 **3.3 Species tree estimation**

342 We estimated the phylogenetic tree based on these 502-OG gene trees and 481-OG gene  
343 trees using ASTRAL 5.6.1<sup>43</sup> (Supplementary Fig. 17). In addition, we also extracted  
344 and concatenated 78 genes from chloroplast genomes of 24 species for phylogenetic  
345 analysis (Supplementary Fig. 18).

346

### 347 **3.4 Divergence time estimation**

348 CDS sequences of 235 single-copy OGs constructed using 11 land plant: *A. thaliana*,  
349 *P. trichocarpa*, *Eucalyptus grandis*, *V. vinifera*, *B. distachyon*, *Elaeis guineensis*,  
350 *Phalaenopsis equestris* and *Spirodela polyrhiza*, *A. trichopoda* and the outgroup *Picea*

351 *abies*, were used for divergence time estimation based on the phylogenetic tree. The  
352 PAML MCMCTREE<sup>30</sup> performs Bayesian estimation of species divergence times using  
353 soft fossil constraints<sup>44</sup> under various molecular clock models. We incorporated three  
354 fossil constraints, i.e., *A. thaliana* - *P. trichocarpa* divergence (97-109 Mya), *E. grandis*  
355 - *V. vinifera* divergence (105-115 Mya) and Eudicots - monocots divergence (130-200  
356 Mya)<sup>45</sup>. The program needs input files including a sequence alignment (nucleotide or  
357 protein), a phylogenetic tree with fossil calibrations, and a control file (usually called  
358 mcmctree.ctl) that contains the instructions for the program. The Markov chain Monte  
359 Carlo (MCMC) process of the PAML mcmctree was set to sample 1,000,000 times,  
360 with the sample frequency set to 50, after a burn-in of 5,000,000 iterations. Parameters  
361 of “finetune” were set at “0.004, 0.016, 0.01, 0.10, 0.58”. Other parameters were set at  
362 default values.

363

### 364 **3.5 Eudicot- and monocot-specific gene families**

365 We achieved 114 eudicot- and 93 monocot-specific gene families from Monocot  
366 PLAZA 3.0<sup>46</sup> (Supplementary Fig. 19) and identified homologous genes present in  
367 *Amborella* and *Liriodendron* using BLASTP<sup>17</sup> with parameters set to: E value  $\leq 1e-5$ ,  
368 identify  $\geq 40\%$  and coverage  $\geq 60\%$ . We then counted the number of eudicot- and  
369 monocot-specific gene families contained in the *Amborella* (29 and 16 respectively)  
370 and *Liriodendron* (52 and 31 respectively) genomes. Furthermore, we performed a chi-  
371 square test to check the difference between the ratio of eudicot- versus monocot-  
372 specific gene families in *Liriodendron* (52/31) and that in *Amborella* (29/16), resulting



373 in a  $\chi^2$  of 0.1166 (p-value = 0.7328), showing no significant difference. We also  
374 performed this analysis on a monocot plant *Spirodella polyrhiza* (a ratio of 15/25) and  
375 a eudicot plant *Macleaya cordata* (a ratio of 78/19) which resulted in a  $\chi^2$  of 15.691 (p-  
376 value = 0.0003708) and  $\chi^2$  of 10.7940 (p-value = 0.0010), both showing a significant  
377 bias (Fig. 2c).

378

### 379 **3.7 Gene family expansion and contraction**

380 We used Café v4.0.1<sup>47</sup>, a random birth and death model proposed to study gene gain  
381 and loss in gene families across a user-specified phylogenetic tree, to identify gene  
382 families that had undergone expansion or contraction across the ML tree that was  
383 constructed based on the 235-gene data set. Usually, a global parameter  $\lambda$  (lambda),  
384 which describes both gene birth ( $\lambda$ ) and death ( $\mu$ , equal to  $-\lambda$ ) rate across all branches  
385 in the tree for all gene families is estimated using maximum likelihood. Then, a  
386 conditional *p*-value is calculated for each gene family, and families with a conditional  
387 *p*-value less than the threshold (0.05) will be considered as having an accelerated rate  
388 of gain and loss. Also, branches responsible for a low overall *p*-value of significant  
389 families will be identified.

390

## 391 **4. Resequencing**

### 392 **4.1 Plant materials used for resequencing**

393 To evaluate a broader range of genetic diversity between the two *Liriodendron* species  
394 and to compare their respective population structures, resequencing was conducted in

395 20 accessions covering a wide range of genetically and phylogenetically diverse  
396 materials. DNA from 14 *L. chinense* and six *L. tulipifera* adult plants was extracted  
397 using a modified CTAB protocol<sup>1</sup>. Paired-end libraries with insert sizes of 100-150 bp  
398 were constructed according to the manufacturer's instruction (Illumina, San Diego, CA,  
399 USA) and sequenced by Illumina sequencing technology at Illumina technology at  
400 Beijing Genome Institute, Shenzhen (BGI-Shenzhen, China). Whole genome  
401 resequencing of 20 *Liriodendron* plants generated from 15.14 Gbp to 72.6 Gbp  
402 nucleotides of sequence with an average depth of 39.4× (Supplementary Table 15).  
403 Sequences have been deposited in the NCBI Sequence Read Archive under project  
404 PRJNA418361. In addition, natural distribution maps of *L. chinense*<sup>48</sup> and *L. tulipifera*  
405 were plotted in R using the package ggmap<sup>49</sup> (Supplementary Fig. 20).

406

#### 407 **4.2 SNP calling**

408 Paired-end reads (100bp or 150bp) obtained from sequencing were mapped to the *de*  
409 *novo* genome with BWA<sup>50</sup>. After the alignment, results in the SAM file format were  
410 converted to bam format using SAMtools v1.3.1<sup>51</sup>. These bam files were sorted and  
411 duplicated reads were marked by Picard pack tools. SNP detection was carried out by  
412 the Genome Analysis Toolkit (GATK, version 3.2.2)<sup>52</sup>. As there is a low-quality  
413 alignment around an indel region, two steps of realignment were implemented in GATK:  
414 the RealignerTargetCreator package was used to identify regions which need  
415 realignment in the first step. Then the IndelRealigner performed realignment of regions  
416 found in the first step. SNP calling was performed with UnifiedGenotyper and Samtools

417 mpileup, then SelectVariants was used to combine the raw vcf files as dbSNP, which  
418 was created by SAMtools and UnifiedGenotyper, filtering raw SNPs with “QD <20.0  
419 or ReadPosRankSum <-8.0 or FS >10.0 or QUAL <meanqual”. After that, base-quality  
420 score recalibration was performed with BaseRecalibrator and the realigned bam file  
421 was reduced by PrintReads and ReduceReads. In the next step CombineVariants was  
422 used to combine the individual Gvcf files into a combind population of vcf files as a  
423 dbSNP. Based on the dbSNP data and the BaseRecalibrator BAM files, GATK was used  
424 to call raw SNPs and indels using parameters from UnifiedGenotyper. After obtaining  
425 the raw result, VQSR, then VariantFiltration were used to filter some low-quality SNPs  
426 with “QD <2.0, MQ <40. 0, ReadPosRankSum <-8.0, FS >60.0, HaplotypeScore >13.0  
427 and MQRankSum <-12.5”. Missing SNP sites were filtered and then used for analysis  
428 in the next step. SNPs were annotated by SNPEFF<sup>53</sup> and summarized by a customized  
429 Perl script. The annotation for the complete SNPs set was used for subsequent positive  
430 selection analysis.

431

### 432 **4.3 Phylogenetic and population structure analysis**

433 SNPs were used to construct a phylogenetic tree, based on the neighbor-join method by  
434 TreeBeST v1.9.2<sup>54</sup> (Fig. 3b) and the Maximum likelihood method by RAxML<sup>55</sup>  
435 (Supplementary Fig. 23). The resulting phylogenetic trees inferred by these two methods  
436 are about the same, excepting the position of the DBS provenance. In the NJ tree, all *L.*  
437 *chinense* individuals from China West clustered together (the CW group) and the rest  
438 of the *L. chinense* collected from China East clustered into the second group (the CE

439 group). LY came from a provenance geographically located in the transition region  
440 between western and eastern China and did not cluster into any group. The third group  
441 (the NA group) was comprised of all *L. tulipifera* individuals collected from North  
442 America. In the ML tree, DBS did not cluster into the east group of China and was  
443 positioned the same as LY. Intriguingly, DBS is geographically close to LY. In general,  
444 both NJ and ML trees clustered these *Liriodendron* individuals into three main  
445 geographical groups. In addition, ped files were created as input for PLINK version  
446 1.07 with parameters “--ped ped\_file --recode12 --geno 0.5 --map output\_map”. Then  
447 the program FRAPPE v1.1<sup>56</sup> was utilized to infer population structure and ancestry  
448 information. The analysis was based on 13.3M SNP sites and we did not assume any  
449 prior information about their ancestry. We ran 10,000 iterations and pre-defined the  
450 number of clusters,  $K$ , from 2 to 5. ADMIXTURE v1.3.0<sup>57</sup> was used to find the best  $K$   
451 value based on a cross-validation test. We performed a PCA following the procedure as  
452 reported. The eigenvector decomposition of the transformed genotype data was  
453 performed using the R function eigen, and the significance of the eigenvectors was  
454 determined with a Tracey-Widom test, implemented in the program twstats, provided  
455 by EIGENSOFT 3.2<sup>58</sup>.

456 Nucleotide diversity ( $\pi$ )<sup>59</sup> and the Watterson estimator ( $\theta_w$ )<sup>60</sup> were used to measure the  
457 degree of variability within a population or species<sup>61</sup>.  $F_{st}$  was used to measure the  
458 population differentiation and genetic distance, based on genetic polymorphism data.  
459  $\pi$ ,  $\theta_w$  and  $F_{st}$  were calculated on the basis of the genotype of each line at each SNP  
460 position using BioPerl.

461

#### 462 **4.4 PSMC analysis**

463 The PSMC model, originally applied to human genomes<sup>62</sup>, after which it was also  
464 applied to plant genomes<sup>63,64</sup>, was used to study the effective population size ( $N_e$ ) of the  
465 two *Liriodendron* species over time. PSMC inferred the local time since the most recent  
466 common ancestor on the basis of the local density of heterozygotes by use of a hidden  
467 Markov model in which the observation is a single diploid sequence<sup>62</sup>. PSMC utilizes  
468 sequence reads that are mapped to a reference genome to estimate historical fluctuations  
469 in  $N_e$ . To scale PSMC results to real time, we assumed 6 years per *Liriodendron*  
470 generation (g) and a per-generation mutation rate ( $\mu$ ) of  $7 \times 10^{-9}$ . PSMC was otherwise  
471 conducted using default parameters.

472 For all *L. chinense*, the first bottleneck occurred about 0.9 million years ago (Fig. 4),  
473 during the Xixiabangma Glaciation, around 1.17-0.8 million years ago<sup>65</sup>. The high mass  
474 accumulation rate (MAR) of Chinese loess<sup>66</sup> during that time indicates a cold and dry  
475 climatic period. Then, the *L. chinense* population started to expand until to its peak  
476 about 0.3-0.4 million years ago, just during an interglacial stage with warm weather as  
477 evidenced by low MAR. Then, along with the beginning of the Guxiang Glaciation (i.e.,  
478 Penultimate Glaciation, 0.3-0.13 million years ago)<sup>65</sup>, the *L. chinense* population  
479 declined rapidly and arrived at its next bottleneck around the time the Baiyu (the Last)  
480 Glaciation occurred (0.07-0.01 million years ago)<sup>65</sup>. The *L. chinense* population always  
481 remained at a very low estimated  $N_e$  in this bottleneck, either during the warm Greatest  
482 Lake Period (30,000-40,000 years ago) or after retreat of the Quaternary glaciation

483 (after 20,000 years ago), indicating that *L chinense* might have migrated and been  
484 restricted to its glacial refugia, widely scattered in eastern Asia.

485 For *L. tulipifera*, there was a sustained decrease of population since the Late Miocene  
486 (Fig. 4). The population bottleneck occurred approximately 0.2 million years ago,  
487 around the time of Penultimate Glaciation. Then, the population of *L. tulipifera*  
488 experienced a period of explosive growth and achieved its peak during the warm  
489 Greatest Lake Period (30,000-40,000 years ago), after which it stayed stable.

490

491 **References**

- 492 1. Murray, M.G. & Thompson, W.F. Rapid isolation of high molecular weight  
493 plant DNA. *Nucleic Acids Res* **8**, 4321-5 (1980).
- 494 2. Mayjonade, B. *et al.* Extraction of high-molecular-weight genomic DNA for  
495 long-read sequencing of single molecules. *Biotechniques* **61**, 203-205  
496 (2016).
- 497 3. Dolezel, J., Bartos, J., Voglmayr, H. & Greilhuber, J. Nuclear DNA content  
498 and genome size of trout and human. *Cytometry A* **51**, 127-128 (2003).
- 499 4. Walker, B.J. *et al.* Pilon: an integrated tool for comprehensive microbial  
500 variant detection and genome assembly improvement. *PLoS One* **9**,  
501 e112963 (2014).
- 502 5. English, A.C. *et al.* Mind the gap: upgrading genomes with Pacific  
503 Biosciences RS long-read sequencing technology. *PLoS One* **7**, e47768  
504 (2012).
- 505 6. Van Ooijen, J.W. *JoinMap 4: Software for the Calculation of Genetic Linkage*  
506 *Maps in Experimental Populations*, (Kyazma, 2006).
- 507 7. Peterson, D.G., Tomkins, J.P., Frisch, D.A., Wing, R.A. & Paterson, A.H.  
508 Construction of plant bacterial artificial chromosome (BAC) libraries: an  
509 illustrated guide. *Journal of Agricultural genomics* **5**, 1-100 (2000).
- 510 8. Zhang, H.B., Zhao, X., Ding, X., Paterson, A.H. & Wing, R.A. Preparation of  
511 megabase-size DNA from plant nuclei. *The Plant Journal* **7**, 175-184 (1995).
- 512 9. Sambrook, J., Fritsch, E.F. & Maniatis, T. *Molecular cloning: a laboratory*  
513 *manual*, (Cold spring harbor laboratory press, 1989).
- 514 10. Grabherr, M.G. *et al.* Full-length transcriptome assembly from RNA-Seq  
515 data without a reference genome. *Nat Biotechnol* **29**, 644-52 (2011).
- 516 11. Simao, F.A., Waterhouse, R.M., Ioannidis, P., Kriventseva, E.V. & Zdobnov,  
517 E.M. BUSCO: assessing genome assembly and annotation completeness  
518 with single-copy orthologs. *Bioinformatics* **31**, 3210-3212 (2015).
- 519 12. Benson, G. Tandem repeats finder: a program to analyze DNA sequences.  
520 *Nucleic Acids Res* **27**, 573-80 (1999).
- 521 13. Jurka, J. *et al.* Repbase Update, a database of eukaryotic repetitive  
522 elements. *Cytogenet Genome Res* **110**, 462-7 (2005).

- 523 14. Price, A.L., Jones, N.C. & Pevzner, P.A. De novo identification of repeat  
524 families in large genomes. *Bioinformatics* **21 Suppl 1**, i351-8 (2005).
- 525 15. Cantarel, B.L. *et al.* MAKER: an easy-to-use annotation pipeline designed  
526 for emerging model organism genomes. *Genome research* **18**, 188-196  
527 (2008).
- 528 16. Bairoch, A. & Apweiler, R. The SWISS-PROT protein sequence database  
529 and its supplement TrEMBL in 2000. *Nucleic Acids Res* **28**, 45-48 (2000).
- 530 17. Altschul, S.F., Gish, W., Miller, W., Myers, E.W. & Lipman, D.J. Basic local  
531 alignment search tool. *J Mol Biol* **215**, 403-10 (1990).
- 532 18. Zdobnov, E.M. & Apweiler, R. InterProScan--an integration platform for  
533 the signature-recognition methods in InterPro. *Bioinformatics* **17**, 847-848  
534 (2001).
- 535 19. Finn, R.D. *et al.* The Pfam protein families database: towards a more  
536 sustainable future. *Nucleic Acids Res* **44**, D279-285 (2016).
- 537 20. Attwood, T.K. *et al.* The PRINTS database: a fine-grained protein sequence  
538 annotation and analysis resource--its status in 2012. *Database (Oxford)*  
539 **2012**, bas019 (2012).
- 540 21. Sigrist, C.J. *et al.* PROSITE, a protein domain database for functional  
541 characterization and annotation. *Nucleic Acids Res* **38**, D161-166 (2010).
- 542 22. Bru, C. *et al.* The ProDom database of protein domain families: more  
543 emphasis on 3D. *Nucleic Acids Res* **33**, D212-215 (2005).
- 544 23. Letunic, I., Doerks, T. & Bork, P. SMART: recent updates, new developments  
545 and status in 2015. *Nucleic Acids Res* **43**, D257-260 (2015).
- 546 24. Kanehisa, M. & Goto, S. KEGG: kyoto encyclopedia of genes and genomes.  
547 *Nucleic Acids Res* **28**, 27-30 (2000).
- 548 25. Lowe, T.M. & Eddy, S.R. tRNAscan-SE: a program for improved detection  
549 of transfer RNA genes in genomic sequence. *Nucleic Acids Res* **25**, 955-64  
550 (1997).
- 551 26. Nawrocki, E.P., Kolbe, D.L. & Eddy, S.R. Infernal 1.0: inference of RNA  
552 alignments. *Bioinformatics* **25**, 1335-7 (2009).
- 553 27. Griffiths-Jones, S. *et al.* Rfam: annotating non-coding RNAs in complete  
554 genomes. *Nucleic Acids Res* **33**, D121-4 (2005).
- 555 28. Wang, Y. *et al.* MCScanX: a toolkit for detection and evolutionary analysis



- 556 of gene synteny and collinearity. *Nucleic Acids Res* **40**, e49 (2012).
- 557 29. Edgar, R.C. MUSCLE: multiple sequence alignment with high accuracy and  
558 high throughput. *Nucleic Acids Res* **32**, 1792-7 (2004).
- 559 30. Yang, Z. PAML 4: phylogenetic analysis by maximum likelihood. *Mol Biol*  
560 *Evol* **24**, 1586-91 (2007).
- 561 31. Maere, S. *et al.* Modeling gene and genome duplications in eukaryotes.  
562 *Proc Natl Acad Sci U S A* **102**, 5454-9 (2005).
- 563 32. Blanc, G. & Wolfe, K.H. Widespread paleopolyploidy in model plant species  
564 inferred from age distributions of duplicate genes. *Plant Cell* **16**, 1667-78  
565 (2004).
- 566 33. Maere, S. *et al.* Modeling gene and genome duplications in eukaryotes.  
567 *Proc Natl Acad Sci U S A* **102**, 5454-5459 (2005).
- 568 34. Li, L., Stoeckert, C.J., Jr. & Roos, D.S. OrthoMCL: identification of ortholog  
569 groups for eukaryotic genomes. *Genome Res* **13**, 2178-89 (2003).
- 570 35. Loytynoja, A. Phylogeny-aware alignment with PRANK. *Methods Mol Biol*  
571 **1079**, 155-70 (2014).
- 572 36. Guindon, S. *et al.* New algorithms and methods to estimate maximum-  
573 likelihood phylogenies: assessing the performance of PhyML 3.0. *Syst Biol*  
574 **59**, 307-21 (2010).
- 575 37. Emms, D.M. & Kelly, S. OrthoFinder: solving fundamental biases in whole  
576 genome comparisons dramatically improves orthogroup inference  
577 accuracy. *Genome Biol* **16**, 157 (2015).
- 578 38. Ibarra-Laclette, E. *et al.* Deep sequencing of the Mexican avocado  
579 transcriptome, an ancient angiosperm with a high content of fatty acids.  
580 *BMC Genomics* **16**, 599 (2015).
- 581 39. Sievers, F. & Higgins, D.G. Clustal Omega for making accurate alignments  
582 of many protein sequences. *Protein Sci* **27**, 135-145 (2018).
- 583 40. Capella-Gutierrez, S., Silla-Martinez, J.M. & Gabaldon, T. TrimAl: a tool for  
584 automated alignment trimming in large-scale phylogenetic analyses.  
585 *Bioinformatics* **25**, 1972-3 (2009).
- 586 41. Stamatakis, A. RAxML-VI-HPC: maximum likelihood-based phylogenetic  
587 analyses with thousands of taxa and mixed models. *Bioinformatics* **22**,  
588 2688-90 (2006).

- 589 42. Shen, X.X., Hittinger, C.T. & Rokas, A. Contentious relationships in  
590 phylogenomic studies can be driven by a handful of genes. *Nat Ecol Evol*  
591 **1**, 126 (2017).
- 592 43. Zhang, C., Sayyari, E. & Mirarab, S. ASTRAL-III: Increased Scalability and  
593 Impacts of Contracting Low Support Branches. 53-75 (2017).
- 594 44. Yang, Z. & Rannala, B. Bayesian estimation of species divergence times  
595 under a molecular clock using multiple fossil calibrations with soft bounds.  
596 *Molecular Biology and Evolution* **23**, 212-226 (2006).
- 597 45. Kumar, S., Stecher, G., Suleski, M. & Hedges, S.B. TimeTree: A Resource for  
598 Timelines, Timetrees, and Divergence Times. *Mol Biol Evol* **34**, 1812-1819  
599 (2017).
- 600 46. Proost, S. *et al.* PLAZA 3.0: an access point for plant comparative genomics.  
601 *Nucleic Acids Res* **43**, D974-81 (2015).
- 602 47. De Bie, T., Cristianini, N., Demuth, J.P. & Hahn, M.W. CAFE: a computational  
603 tool for the study of gene family evolution. *Bioinformatics* **22**, 1269-71  
604 (2006).
- 605 48. Hao, R., He, S., Tang, S. & S., W. Geographical distribution of *Liriodendron*  
606 *chinense* in China and its significance. *Journal of Plant Resources and*  
607 *Environment (China)* **4**, 1-6 (1995).
- 608 49. Kahle, D. & Wickham, H. ggmap: Spatial Visualization with ggplot2. *R*  
609 *Journal* **5**, 144-161 (2016).
- 610 50. Li, H. & Durbin, R. Fast and accurate short read alignment with Burrows-  
611 Wheeler transform. *Bioinformatics* **25**, 1754-60 (2009).
- 612 51. Li, H. *et al.* The Sequence Alignment/Map format and SAMtools.  
613 *Bioinformatics* **25**, 2078-9 (2009).
- 614 52. DePristo, M.A. *et al.* A framework for variation discovery and genotyping  
615 using next-generation DNA sequencing data. *Nat Genet* **43**, 491-8 (2011).
- 616 53. Cingolani, P. *et al.* A program for annotating and predicting the effects of  
617 single nucleotide polymorphisms, SnpEff: SNPs in the genome of  
618 *Drosophila melanogaster* strain w1118; iso-2; iso-3. *Fly (Austin)* **6**, 80-92  
619 (2012).
- 620 54. Vilella, A.J. *et al.* EnsemblCompara GeneTrees: Complete, duplication-  
621 aware phylogenetic trees in vertebrates. *Genome Res* **19**, 327-35 (2009).

- 622 55. Stamatakis, A. RAxML-VI-HPC: maximum likelihood-based phylogenetic  
623 analyses with thousands of taxa and mixed models. *Bioinformatics* **22**,  
624 2688-2690 (2006).
- 625 56. Tang, H., Peng, J., Wang, P. & Risch, N.J. Estimation of individual admixture:  
626 analytical and study design considerations. *Genet Epidemiol* **28**, 289-301  
627 (2005).
- 628 57. Alexander, D.H., Novembre, J. & Lange, K. Fast model-based estimation of  
629 ancestry in unrelated individuals. *Genome Res* **19**, 1655-64 (2009).
- 630 58. Price, A.L. *et al.* Principal components analysis corrects for stratification in  
631 genome-wide association studies. *Nat Genet* **38**, 904-9 (2006).
- 632 59. Nei, M. & Li, W.H. Mathematical model for studying genetic variation in  
633 terms of restriction endonucleases. *Proc Natl Acad Sci U S A* **76**, 5269-73  
634 (1979).
- 635 60. Watterson, G.A. On the number of segregating sites in genetical models  
636 without recombination. *Theor Popul Biol* **7**, 256-76 (1975).
- 637 61. Tajima, F. Evolutionary relationship of DNA sequences in finite populations.  
638 *Genetics* **105**, 437-60 (1983).
- 639 62. Li, H. & Durbin, R. Inference of human population history from individual  
640 whole-genome sequences. *Nature* **475**, 493-496 (2011).
- 641 63. Ibarra-Laclette, E. *et al.* Architecture and evolution of a minute plant  
642 genome. *Nature* **498**, 94-8 (2013).
- 643 64. Amborella Genome, P. The Amborella genome and the evolution of  
644 flowering plants. *Science* **342**, 1241089 (2013).
- 645 65. Zheng, B.X., Xu, Q.Q. & Shen, Y.P. The relationship between climate change  
646 and Quaternary glacial cycles on the Qinghai-Tibetan Plateau: review and  
647 speculation. *Quaternary International* **97**, 93-101 (2002).
- 648 66. Sun, Y.B. & An, Z.S. Late Pliocene-Pleistocene changes in mass  
649 accumulation rates of eolian deposits on the central Chinese Loess Plateau.  
650 *Journal of Geophysical Research Atmospheres* **110**, D23101 (2005).

651

## Supplementary Tables

**Supplementary Table 1. Summary of library construction and sequencing of Illumina data.**

| <b>Paired-end<br/>Libraries</b> | <b>Insert<br/>Size</b> | <b>Average Read<br/>Length (bp)</b> | <b>Total<br/>Clean /Raw<br/>Data (Gb)</b> | <b>Sequencing<br/>Depth (×)<sup>a</sup></b> | <b>Physical Depth (×)</b> |
|---------------------------------|------------------------|-------------------------------------|-------------------------------------------|---------------------------------------------|---------------------------|
| <b>Solexa Reads</b>             | 170 bp                 | 100                                 | 118.98/130.82                             | 67.83/74.58                                 | 57.66/63.39               |
|                                 | 250 bp                 | 150                                 | 45.83/53.39                               | 26.13/30.44                                 | 21.78/25.37               |
|                                 | 500 bp                 | 100                                 | 83.98/94.38                               | 47.88/53.81                                 | 119.70/134.53             |
|                                 | 800 bp                 | 100                                 | 78.32/88.82                               | 44.66/50.64                                 | 178.64/202.56             |
|                                 | <b>Total</b>           |                                     |                                           | 327.11/367.41                               | 186.5/209.47              |

<sup>a</sup>: We estimate the sequencing coverage by assuming the genome size to be 1.75 Gb.

**Supplementary Table 2. Statistics of corrected PB reads.**

| <b>Reads</b>    | <b>Size (bp)</b> | <b>Number</b> | <b>Depth</b> |
|-----------------|------------------|---------------|--------------|
| subreads >= 2k  | 147,893,889,877  | 12,381,613    | 87           |
| subreads >= 5k  | 139,096,142,067  | 9,817,481     | 81.82        |
| subreads >= 10k | 114,919,709,311  | 6,546,414     | 67.60        |
| subreads >= 12k | 101,694,888,173  | 5,344,942     | 59.82        |
| subreads >= 15k | 80,162,479,742   | 3,742,966     | 47.15        |
| subreads >= 16k | 72,869,462,837   | 3,272,275     | 42.86        |
| subreads >= 20k | 46,478,797,744   | 1,792,900     | 27.34        |
| subreads >= 25k | 24,351,603,157   | 795,790       | 14.32        |
| subreads >= 30k | 11,919,374,791   | 338,169       | 7.01         |
| subreads >= 35k | 5,412,158,385    | 135,834       | 3.18         |
| subreads >= 40k | 2,228,225,395    | 50,081        | 1.31         |

**Supplementary Table 3. Statistics of Bionano optical maps.**

|                             | <b>Number</b> | <b>Length (bp)</b> |
|-----------------------------|---------------|--------------------|
| Total data                  |               | 315,411,275,361    |
| Total label                 | 20,474,808    |                    |
| Total molecule              | 1,546,266     |                    |
| Molecule (label number > 6) | 1,189,663     |                    |
| Average label per molecule  | 13.24         |                    |
| Density of label per 100kb  | 6.49          |                    |
| Molecule length > 100kb     | 1,546,266     | 315,411,275,361    |
| Molecule length > 150kb     | 893,335       | 235,559,291,832    |

**Supplementary Table 4. Estimation of the *L. chinense* genome size based on 17 K-mer statistics.**

| <b>k-mer</b> | <b>k-mer no.</b> | <b>Peak depth</b> | <b>Genome size</b> | <b>Used bases</b> | <b>Used reads</b> | <b>Depth</b> |
|--------------|------------------|-------------------|--------------------|-------------------|-------------------|--------------|
| 17           | 4,210,050,595    | 24                | 1,754,187,748      | 52,625,632,420    | 657,820,404       | 30           |

**Supplementary Table 5. Summary of the *L. chinense* genome assembly.**

|                                 | Contig        |        | Scaffold      |        |
|---------------------------------|---------------|--------|---------------|--------|
|                                 | Size (bp)     | Number | Size (bp)     | Number |
| <b>N90<sup>a</sup></b>          | 190,349       | 1,500  | 276,287       | 638    |
| <b>N80</b>                      | 483,159       | 953    | 1,192,516     | 375    |
| <b>N70</b>                      | 786,779       | 674    | 1,988,182     | 265    |
| <b>N60</b>                      | 1,090,133     | 487    | 2,855,213     | 192    |
| <b>N50</b>                      | 1,434,331     | 347    | 3,525,943     | 138    |
| <b>Longest</b>                  | 9,960,025     |        | 19,271,491    |        |
| <b>Total Size</b>               | 1,742,411,609 |        | 1,742,423,874 |        |
| <b>Total Number<br/>(≥1kb)</b>  |               | 4,624  |               | 3,711  |
| <b>Total Number<br/>(≥10kb)</b> |               | 4,242  |               | 3,329  |

<sup>a</sup>: Nxx length is the maximum length L such that xx% of all nucleotides lie in contigs (or scaffolds) of size at least L.



**Supplementary Table 6. Summary of linkage map construction.**

| <b>Linkage group</b> | <b>Anchoring markers (no.)</b> | <b>cM</b> | <b>Scaffolds (no.)</b> | <b>Size (bp)</b> |
|----------------------|--------------------------------|-----------|------------------------|------------------|
| <b>1</b>             | 142                            | 178.5     | 33                     | 96,007,009       |
| <b>2</b>             | 133                            | 190.6     | 33                     | 99,473,975       |
| <b>3</b>             | 111                            | 198       | 36                     | 96,689,308       |
| <b>4</b>             | 97                             | 149.17    | 38                     | 76,263,199       |
| <b>5</b>             | 93                             | 126.4     | 21                     | 63,449,182       |
| <b>6</b>             | 96                             | 154.04    | 29                     | 65,192,789       |
| <b>7</b>             | 104                            | 200.3     | 26                     | 87,369,336       |
| <b>8</b>             | 75                             | 119.15    | 25                     | 64,408,360       |
| <b>9</b>             | 79                             | 134.36    | 17                     | 58,375,695       |
| <b>10</b>            | 85                             | 118.1     | 24                     | 68,352,314       |
| <b>11</b>            | 71                             | 108.4     | 21                     | 70,397,449       |
| <b>12</b>            | 66                             | 93.16     | 30                     | 69,840,316       |
| <b>13</b>            | 67                             | 112.55    | 32                     | 75,054,824       |
| <b>14</b>            | 67                             | 118.5     | 38                     | 74,942,525       |
| <b>15</b>            | 72                             | 127.4     | 41                     | 56,984,379       |
| <b>16</b>            | 49                             | 44.6      | 27                     | 67,893,758       |
| <b>17</b>            | 54                             | 97.7      | 19                     | 54,703,317       |
| <b>18</b>            | 63                             | 115.3     | 17                     | 63,323,318       |
| <b>19</b>            | 52                             | 95.3      | 22                     | 57,223,572       |

**Supplementary Table 7. Gene annotation in the *L. chinense* genome.**

|                    | <b>Number</b> | <b>Percent (%)</b> |
|--------------------|---------------|--------------------|
| <b>Total</b>       | 35,269        | 100.00             |
| <b>Annotated</b>   | 29,482        | 83.59              |
| <b>SwissProt</b>   | 22,530        | 63.88              |
| <b>TrEMBL</b>      | 29,089        | 82.48              |
| <b>InterPro</b>    | 28,080        | 79.62              |
| <b>KEGG</b>        | 22,123        | 62.73              |
| <b>Unannotated</b> | 5,787         | 16.41              |

**Supplementary Table 8. Assessment of the *L. chinense* genome assembly using RNA-seq data.**

| Dataset | Number | Total Length (bp) | Bases Covered   | Sequences Covered | With >90%                |         | With >50%                |         |
|---------|--------|-------------------|-----------------|-------------------|--------------------------|---------|--------------------------|---------|
|         |        |                   | by Assembly (%) | by Assembly (%)   | Sequence in one Scaffold | Percent | Sequence in one Scaffold | Percent |
|         |        |                   |                 |                   | Number                   | (%)     | Number                   | (%)     |
| All     | 66,934 | 51,960,045        | 97.80           | 99.78             | 61,508                   | 91.89   | 66,578                   | 99.47   |
| >200bp  | 66,934 | 51,960,045        | 97.80           | 99.78             | 61,508                   | 91.89   | 66,578                   | 99.47   |
| >500bp  | 28,940 | 40,497,573        | 97.64           | 99.85             | 26,074                   | 90.10   | 28,772                   | 99.42   |
| >1000bp | 16,537 | 31,698,287        | 97.50           | 99.90             | 14,684                   | 88.79   | 16,443                   | 99.43   |

**Supplementary Table 9. Assessment of the *L. chinense* genome assembly and annotation completeness using BUSCO.**

| <b>Types of BUSCOs</b>                 | <b>Count</b> | <b>Ratio</b> |
|----------------------------------------|--------------|--------------|
| <b>Complete BUSCOs</b>                 | 1,300        | 90.28%       |
| <b>Complete and single-copy BUSCOs</b> | 1,190        | 82.64%       |
| <b>Complete and duplicated BUSCOs</b>  | 110          | 7.64%        |
| <b>Fragmented BUSCOs</b>               | 47           | 3.26%        |
| <b>Missing BUSCOs</b>                  | 93           | 6.46%        |

**Supplementary Table 10. Prediction of repetitive sequences in the *L. chinense* genome.**

| Type                                 | Repeat Size (bp) | % of Genome |
|--------------------------------------|------------------|-------------|
| <b>RepeatProteinMask<sup>a</sup></b> | 258,445,113      | 14.83       |
| <b>RepeatMasker<sup>b</sup></b>      | 236,234,135      | 13.56       |
| <b>TRF<sup>c</sup></b>               | 79,438,868       | 4.56        |
| <b><i>De novo</i><sup>d</sup></b>    | 1,039,699,474    | 59.67       |
| <b>Total<sup>e</sup></b>             | 1,111,834,359    | 63.81       |

<sup>a</sup> and <sup>b</sup>: RepeatProteinMask and RepeatMasker were used to identify repeats in the genome according to homology to identified repeat elements in Repbase.

<sup>c</sup>: TRF was used to predict tandem repeats.

<sup>d</sup>: RepeatMasker was used to identify *de novo* repeat elements in the genome according to results from Piler-DF, RepeatScout and LTR-FINDER.

<sup>e</sup>: Total repeat regions were identified after combining all repeats identified and removing redundancy.

**Supplementary Table 11. Categories of TEs predicted in the *L. chinense* genome.**

|                          | RepBase TEs     |                | TE Proteins     |                | <i>De novo</i>  |                | Combined TEs <sup>a</sup> |                |
|--------------------------|-----------------|----------------|-----------------|----------------|-----------------|----------------|---------------------------|----------------|
|                          | Length<br>(Mbp) | % in<br>Genome | Length<br>(Mbp) | % in<br>Genome | Length<br>(Mbp) | % in<br>Genome | Length<br>(Mbp)           | % in<br>Genome |
| <b>DNA</b>               | 16.73           | 0.96           | 3.16            | 0.18           | 88.78           | 5.10           | 101.22                    | 5.81           |
| <b>LINE</b>              | 12.89           | 0.74           | 2.45            | 0.14           | 18.12           | 1.04           | 29.59                     | 1.70           |
| <b>SINE</b>              | 0.06            | 0              | 0               | 0              | 0.32            | 0.02           | 0.38                      | 0.02           |
| <b>LTR</b>               | 208.76          | 11.98          | 252.84          | 14.51          | 940.91          | 54.00          | 980.11                    | 56.25          |
| <b>Other</b>             | 0.002           | 0              | 0               | 0              | 0               | 0              | 0.002                     | 0              |
| <b>Unknown</b>           | 0               | 0              | 0               | 0              | 6.64            | 0.38           | 6.64                      | 0.38           |
| <b>Total<sup>a</sup></b> | 236.23          | 13.56          | 258.45          | 14.83          | 1,025.30        | 58.84          | 1,074.11                  | 61.64          |

<sup>a</sup>: the total number of TEs was identified by combining all repeats identified through different methods. As there are some overlaps between different methods, the combined number of TEs is less than the sum of repeats identified by all methods.

**Supplementary Table 12. Subcategories of TEs predicted in the *L. chinense* genome.**

| Classification                 |                     | <i>L. chinense</i> |             |
|--------------------------------|---------------------|--------------------|-------------|
| Order                          | Superfamily         | Length (Mb)        | % of genome |
| <b>Class I Retrotransposon</b> |                     |                    |             |
| LTR                            | <i>Gypsy</i>        | 704.67             | 40.45       |
|                                | <i>Copia</i>        | 227.86             | 13.08       |
|                                | <i>ERV</i>          | 3.05               | 0.18        |
|                                | <i>Caulimovirus</i> | 2.08               | 0.12        |
|                                | other               | 42.45              | 2.44        |
| LINE                           | <i>RTE</i>          | 8.14               | 0.47        |
|                                | <i>L1</i>           | 19.57              | 1.12        |
|                                | <i>L2</i>           | 0.41               | 0.02        |
|                                | other               | 1.47               | 0.08        |
| SINE                           | <i>tRNA</i>         | 0.16               | 0.01        |
|                                | <i>5S</i>           | 1.12E-04           | 6.43E-06    |
|                                | other               | 0.22               | 0.01        |
| Unclassified                   |                     | 1.58E-03           | 8.84E-06    |
| <b>Class II DNA transposon</b> |                     |                    |             |
| TIR                            | <i>PIF</i>          | 2.95               | 0.17        |
|                                | <i>hAT</i>          | 22.18              | 1.27        |
|                                | <i>TcMar</i>        | 0.71               | 0.04        |
|                                | <i>EnSpm</i>        | 51.00              | 2.93        |
|                                | <i>MuDR</i>         | 2.14               | 0.12        |
|                                | other               | 19.09              | 1.09        |
| Crypton                        | <i>Crypton</i>      | 0.32               | 0.02        |
| Helitron                       | <i>Helitron</i>     | 2.05               | 0.12        |
| Maverick                       | <i>Maverick</i>     | 0.78               | 0.04        |
| Unclassified                   |                     | 4.20E-04           | 1.56E-04    |
| <b>Unknown</b>                 |                     | 6.64               | 0.38        |
| <b>Total TEs</b>               |                     | 1074.11            | 61.64       |

**Supplementary Table 13. Statistical analysis of the distribution of three TE superfamilies in four *Liriodendron* genome regions.**

|                          | <i>Copia</i>    |                  | <i>Gypsy</i>    |                  | <i>LINE/L1</i>  |                  |
|--------------------------|-----------------|------------------|-----------------|------------------|-----------------|------------------|
|                          | Observed values | Predicted values | Observed values | Predicted values | Observed values | Predicted values |
| <b>Gene</b>              | 146,796         | 148,284.30       | 171,039         | 264,487.90       | 25,453          | 11,542.90        |
| <b>Proximal Promoter</b> | 3,714           | 38,502.40        | 7,026           | 68,674.95        | 204             | 2,997.14         |
| <b>Proximal 3' End</b>   | 2,884           | 38,502.40        | 5,787           | 68,674.95        | 130             | 2,997.14         |
| <b>Intergenic</b>        | 562,264         | 490,440.40       | 1,092,634       | 874,775.90       | 29,922          | 38,177.38        |

All these three TE superfamilies, i.e., *Copia*, *Gypsy*, *LINE/L1*, showed an uneven distribution throughout the *Liriodendron* genome with  $\chi^2$  values of 74,924, 200,220 and 23,896, respectively, and all p-values of zero. The blue colour indicates that the predicted value is bigger than the observed value, and the red colour indicates that the predicted value is smaller than the observed value.



**Supplementary Table 14.** A summary of research on the phylogenetic relationships among magnoliids, eudicots and monocots.

| Author             | Year | Journal                                  | Article                                                                                                                                                                                             | Gene                         |                                                                    |                          | Non-coding sequence | Morphological characters        | Species number | Gene number | Method                 | Software    | Simplified topology                                            | Classification | DOI                              |
|--------------------|------|------------------------------------------|-----------------------------------------------------------------------------------------------------------------------------------------------------------------------------------------------------|------------------------------|--------------------------------------------------------------------|--------------------------|---------------------|---------------------------------|----------------|-------------|------------------------|-------------|----------------------------------------------------------------|----------------|----------------------------------|
|                    |      |                                          |                                                                                                                                                                                                     | nucleus                      | plastid                                                            | mitochondrion            |                     |                                 |                |             |                        |             |                                                                |                |                                  |
| Mathews & Donoghue | 1999 | Science                                  | The Root of Angiosperm Phylogeny Inferred from Duplicate Phytochrome Genes                                                                                                                          | PHYA, PHYC                   | -                                                                  | -                        | -                   | -                               | 26             | 2           | concatenated, MP       | PAUP- 4.0   | ((magnoliids, (monocots, eudicots) <50)86, basal angiosperm)   | III            | 10.1126/science.286.5441.947     |
| Soltis et al.      | 1999 | Nature                                   | Angiosperm phylogeny inferred from multiple genes as a tool for comparative biology                                                                                                                 | 18S rDNA                     | atpB, rbcL                                                         | -                        | -                   | -                               | 567            | 3           | concatenated, MP       | PAUP- 4.0   | ((eudicots, (monocots, magnoliids) 567:71, basal angiosperm)   | II             | 10.1038/461528                   |
| Qiu et al.         | 1999 | Nature                                   | The earliest angiosperms: evidence from mitochondrial, plastid and nuclear genomes                                                                                                                  | 18S rDNA                     | atpB, rbcL                                                         | atp1, matR               | -                   | -                               | 105            | 5           | concatenated, MP       | PAUP-4.0b2  | ((monocots, (eudicots, magnoliids) <50) <50, basal angiosperm) | I              | 10.1038/461528                   |
| Barlman et al.     | 2000 | PNAS                                     | Independent and combined analyses of sequences from all three genomic compartments converge on the root of flowering plant phylogeny                                                                | 18S rDNA                     | atpB, rbcL                                                         | atp1, matR, cox1         | -                   | -                               | 35             | 6           | concatenated, NJ       | PAUP-4.0b3  | ((monocots, (eudicots, magnoliids) <50)99, basal angiosperm)   | I              | 10.1073/pnas.220427497           |
| Graham & Olmstead  | 2000 | American Journal of Botany               | Utility of 17 chloroplast genes for inferring the phylogeny of the basal angiosperms                                                                                                                | -                            | √                                                                  | -                        | -                   | -                               | 19             | 17          | concatenated, MP       | PAUP-       | ((magnoliids, (monocots, eudicots) 25:76, basal angiosperm)    | III            | 10.2307/2656749                  |
| Soltis et al.      | 2000 | Botanical Journal of the Linnean Society | Angiosperm phylogeny inferred from 18s rDNA, rbcL, and atpB sequences                                                                                                                               | 18S rDNA                     | atpB, rbcL                                                         | -                        | -                   | -                               | 567            | 3           | concatenated, MP       | RATCHET     | ((eudicots, (monocots, magnoliids), basal angiosperm)          | I              | 10.1m+kjv1.2000.0380             |
| Qiu et al.         | 2000 | International Journal of Plant Sciences  | Phylogeny of Basal Angiosperms: Analyses of Five Genes from Three Genomes                                                                                                                           | 18S rDNA                     | atpB, rbcL                                                         | atp1, matR               | -                   | -                               | 105            | 5           | concatenated, MP       | PAUP-4.0b2  | ((monocots, (eudicots, magnoliids) <50) <50, basal angiosperm) | I              | 10.1086/317584                   |
| Doyle & Endress    | 2000 | International Journal of Plant Sciences  | Morphological Phylogenetic Analysis of Basal Angiosperms: Comparison and Combination with Molecular Data                                                                                            | 18S rDNA                     | atpB, rbcL                                                         | -                        | -                   | 108                             | 52             | -           | concatenated, MP       | PAUP 3.1.1  | ((eudicots, (monocots, magnoliids) <50)63, basal angiosperm)   | II             | 10.1086/317578                   |
| Sun et al.         | 2002 | Science                                  | Archaeofrutaceae, a New Basal Angiosperm Family                                                                                                                                                     | 18S rDNA                     | atpB, rbcL                                                         | -                        | -                   | 17                              | 174            | -           | MP                     | -           | ((eudicots, (monocots, magnoliids), basal angiosperm)          | II             | 10.1126/science.1069439          |
| Borsch et al.      | 2003 | Journal of Evolutionary Biology          | Noncoding plastid trnT-trnF sequences reveal a well resolved phylogeny of basal angiosperms                                                                                                         | -                            | -                                                                  | -                        | trnT-trnF           | -                               | 38             | -           | MP                     | PAUP-4.0b6  | ((monocots, (eudicots, magnoliids) <50)100, basal angiosperm)  | I              | 10.1046/j.1420-9101.2003.00577.x |
| Qiu et al.         | 2005 | International Journal of Plant Sciences  | Phylogenetic analyses of basal angiosperms based on nine plastid, mitochondrial, and nuclear genes                                                                                                  | 18S rDNA, 26S rDNA           | atpB, matK, rbcL                                                   | atp1, matR, mtLSU, mtLSU | -                   | -                               | 100            | 9           | concatenated, MP       | PAUP-4.0b2  | ((magnoliids, (monocots, eudicots) <50) <50, basal angiosperm) | III            | 10.1073/pnas.0709121104          |
| Saarela et al.     | 2007 | Nature                                   | Hydatellaceae identified as a new branch near the base of the angiosperm phylogenetic tree                                                                                                          | -                            | √                                                                  | -                        | √                   | -                               | 29             | -           | MP                     | PAUP-4.0b10 | ((magnoliids, (monocots, eudicots) 93:100, basal angiosperm)   | III            | 10.1038/nature05612              |
| Jansen et al.      | 2007 | PNAS                                     | Analysis of 81 genes from 64 plastid genomes resolves relationships in angiosperms and identifies genome-scale evolutionary patterns                                                                | -                            | √                                                                  | -                        | -                   | -                               | 64             | 81          | concatenated, ML       | PHYML 2.4.4 | ((magnoliids, (monocots, eudicots) 95:100, basal angiosperm)   | III            | 10.1073/pnas.0709121104          |
| Moore et al.       | 2007 | PNAS                                     | Using plastid genome-scale data to resolve enigmatic relationships among basal angiosperms                                                                                                          | -                            | √                                                                  | -                        | -                   | -                               | 45             | 61          | concatenated, ML       | GARLI       | ((magnoliids, (monocots, eudicots) 88:100, basal angiosperm)   | III            | 10.1073/pnas.0708072104          |
| Burleigh et al.    | 2009 | BMC Evolutionary Biology                 | Inferring phylogenies with incomplete data sets: a 5-gene, 567-taxon analysis of angiosperms                                                                                                        | 18S rDNA                     | atpB, rbcL                                                         | -                        | -                   | -                               | 567            | 3           | concatenated, ML       | GARLI 0.951 | ((monocots, (eudicots, magnoliids) 39:100, basal angiosperm)   | I              | 10.1186/1471-2148-9-61           |
| Soltis et al.      | 2009 | American Journal of Botany               | FLORAL VARIATION AND FLORAL GENETICS IN BASAL ANGIOSPERMS                                                                                                                                           | 18S rDNA, 26S rDNA           | atpB, matK, rbcL                                                   | -                        | -                   | IR region of the plastid genome | 567            | 5           | concatenated, ML       | GARLI 0.951 | ((monocots, (eudicots, magnoliids) 33:100, basal angiosperm)   | I              | 10.3732/ajb.0800182              |
| Bell et al.        | 2010 | American Journal of Botany               | The age and diversification of the angiosperms re-visited                                                                                                                                           | 18S rDNA                     | atpB, rbcL                                                         | -                        | -                   | -                               | 567            | 3           | concatenated, Bayesian | BEAST 1.4.8 | ((monocots, (eudicots, magnoliids), basal angiosperm)          | I              | 10.3732/ajb.0900346              |
| Moore et al.       | 2010 | PNAS                                     | Phylogenetic analysis of 83 plastid genes further resolves the early diversification of eudicots                                                                                                    | -                            | √                                                                  | -                        | -                   | -                               | 86             | 83          | concatenated, ML       | RAxML       | ((magnoliids, (monocots, eudicots) 85:100, basal angiosperm)   | III            | 10.1073/pnas.0907801107          |
| Qiu et al.         | 2010 | Journal of Systematics and Evolution     | Angiosperm phylogeny inferred from sequences of four mitochondrial genes                                                                                                                            | -                            | -                                                                  | atp1, matR, nad5, rps3   | -                   | -                               | 356            | 4           | concatenated, ML       | RAxML 7.0.4 | ((magnoliids, (monocots, eudicots) 15:12, basal angiosperm)    | III            | 10.1111/j.1365-3113.2010.00097.x |
| Soltis et al.      | 2011 | American Journal of Botany               | ANGIOSPERM PHYLOGENY: 17 GENES, 640 TAXA                                                                                                                                                            | 18S rDNA, 26S rDNA           | atpB, matK, ndhF, psbB, psbT, psbK, psbH, rbcL, rpoC2, rps16, rps4 | atp1, matR, nad5, rps3   | -                   | -                               | 640            | 17          | concatenated, ML       | RAxML       | ((magnoliids, (monocots, eudicots) 68:100, basal angiosperm)   | III            | 10.3732/ajb.1000404              |
| Moore et al.       | 2011 | International Journal of Plant Sciences  | Phylogenetic Analysis of the Plastid Inverted Repeat for 244 Species: Insights into Deeper-Level Angiosperm Relationships from a Long, Slowly Evolving Sequence Region                              | -                            | √                                                                  | -                        | √                   | -                               | 244            | -           | concatenated, ML       | RAxML 7.2.6 | ((monocots, (eudicots, magnoliids) 55:100, basal angiosperm)   | I              | 10.1086/658923                   |
| Zhang et al.       | 2012 | New Phytologist                          | Highly conserved low-copy nuclear genes as effective markers for phylogenetic analyses in angiosperms                                                                                               | SMC1, SMC2, MSH1, MLH1, MCM5 | -                                                                  | -                        | -                   | -                               | 91             | 5           | concatenated, ML       | RAxML       | ((eudicots, (monocots, magnoliids) 92:100, basal angiosperm)   | II             | 10.1111/j.1469-8137.2012.04212.x |
| Xi et al.          | 2014 | Systematic Biology                       | Coalescent versus Concatenation Methods and the Placement of Amborella as Sister to Water Lilies                                                                                                    | √                            | -                                                                  | -                        | -                   | -                               | 45             | 310         | coalescent             | STAR        | ((monocots, (eudicots, magnoliids) 88:100, basal angiosperm)   | I              | 10.1093/sysbio/yty055            |
| Wickett et al.     | 2014 | PNAS                                     | Phylotranscriptomic analysis of the origin and early diversification of land plants                                                                                                                 | √                            | -                                                                  | -                        | -                   | -                               | 92             | 674         | concatenated, ML       | RAxML       | ((monocots, (eudicots, magnoliids) 100:100, basal angiosperm)  | I              | 10.1073/pnas.1323926111          |
| Zeng et al.        | 2014 | Nature Communications                    | Resolution of deep angiosperm phylogeny using conserved nuclear genes and estimates of early divergence times                                                                                       | √                            | -                                                                  | -                        | -                   | -                               | 92             | 424         | coalescent             | ASTRAL      | ((monocots, (eudicots, magnoliids) 100:100, basal angiosperm)  | I              | 10.1073/pnas.1323926111          |
| Ruhfel et al.      | 2014 | BMC Evolutionary Biology                 | From algae to angiosperms—inferring the phylogeny of green plants (Viridiplantae) from 360 plastid genomes                                                                                          | √                            | -                                                                  | -                        | -                   | -                               | 61             | 59          | concatenated, ML       | RAxML       | ((monocots, (eudicots, magnoliids) 94:100, basal angiosperm)   | I              | 10.1038/ncomms5956               |
| Wu et al.          | 2014 | BMC Plant Biology                        | A precise chloroplast genome of Nelumbo nucifera (Nelumbonaceae) evaluated with Sanger, Illumina MiSeq, and PacBio RS II sequencing platforms: insight into the plastid evolution of basal eudicots | √                            | -                                                                  | -                        | -                   | -                               | 360            | 78          | concatenated, ML       | RAxML 7.3.0 | ((magnoliids, (monocots, eudicots) 63:100, basal angiosperm)   | III            | 10.1186/1471-2149-14-23          |
| Sun et al.         | 2015 | Molecular Phylogenetics and Evolution    | Deep phylogenetic incongruence in the angiosperm clade Rosidae                                                                                                                                      | √                            | -                                                                  | -                        | -                   | -                               | 82             | 78          | -                      | -           | ((magnoliids, (monocots, eudicots) 72:100, basal angiosperm)   | III            | 10.1186/s12870-014-0289-0        |
| Magallon et al.    | 2015 | New Phytologist                          | A mesocalibrated time-tree documents the early rise of flowering plant phylogenetic diversity                                                                                                       | 18S rDNA, 26S rDNA           | atpB, rbcL, matK                                                   | -                        | -                   | -                               | 792            | 5           | concatenated, ML       | RAxML 7.2.8 | ((eudicots, (monocots, magnoliids) 63:100, basal angiosperm)   | II             | 10.1016/j.ympev.2014.11.003      |
| Sun et al.         | 2015 | Molecular Phylogenetics and Evolution    | Phylogenetic and structural analyses of 18 complete plastomes across all families of early-diverging eudicots, including an angiosperm-wide analysis of 18 genes content evolution                  | -                            | √                                                                  | -                        | -                   | -                               | 79             | 4           | -                      | -           | ((eudicots, (monocots, magnoliids) 54:100, basal angiosperm)   | III            | 10.1111/nph.12364                |
| Sun et al.         | 2015 | Molecular Phylogenetics and Evolution    | Phylogenetic and structural analyses of 18 complete plastomes across all families of early-diverging eudicots, including an angiosperm-wide analysis of 18 genes content evolution                  | -                            | √                                                                  | -                        | -                   | -                               | 97             | 79          | concatenated, ML       | RAxML 7.4.2 | ((magnoliids, (monocots, eudicots) 65:100, basal angiosperm)   | III            | 10.1016/j.ympev.2015.12.006      |

**Supplementary Table 15. Summary of resequencing analysis.**

| Class                | Province / State    | Voucher No.   | Resource type | Insert size (bp) | Depth | Size (Gb) | SNP        |              |
|----------------------|---------------------|---------------|---------------|------------------|-------|-----------|------------|--------------|
|                      |                     |               |               |                  |       |           | homozygous | heterozygous |
| <i>L. chinense</i>   | Meng La (ML)        | Li.ch-ML-001  | Illumina, PE  | 150              | 46.00 | 28.22     | 9,212,964  | 1,575,766    |
| <i>L. chinense</i>   | Xu Yong (XY)        | Li.ch-XY-001  | Illumina, PE  | 500              | 26.43 | 16.21     | 6,576,024  | 5,813,650    |
| <i>L. chinense</i>   | Li Ping (LP)        | Li.ch-LP-001  | Illumina, PE  | 150              | 41.19 | 25.26     | 6,549,559  | 6,673,615    |
| <i>L. chinense</i>   | Sui Ning (SN)       | Li.ch-SN-001  | Illumina, PE  | 150              | 42.40 | 26.01     | 6,161,793  | 6,952,082    |
| <i>L. chinense</i>   | Song Tao (ST)       | Li.ch-ST-001  | Illumina, PE  | 500              | 26.34 | 16.15     | 6,104,629  | 5,992,413    |
| <i>L. chinense</i>   | E Xi (EX)           | Li.ch-EX-001  | Illumina, PE  | 500              | 27.22 | 16.69     | 6,326,851  | 4,742,868    |
| <i>L. chinense</i>   | Sang Zhi (SZ)       | Li.ch-SZ-001  | Illumina, PE  | 150              | 46.98 | 28.82     | 5,870,353  | 6,964,618    |
| <i>L. chinense</i>   | Liu Yang (LY)       | Li.ch-LY-001  | Illumina, PE  | 150              | 42.29 | 25.95     | 5,913,839  | 4,304,401    |
| <i>L. chinense</i>   | Dabie Shan (DBS)    | Li.ch-DBS-001 | Illumina, PE  | 500              | 34.07 | 20.90     | 5,721,144  | 3,320,139    |
| <i>L. chinense</i>   | Song Yang (SY)      | Li.ch-SY-001  | Illumina, PE  | 150              | 42.38 | 26.00     | 2,837,702  | 6,165,351    |
| <i>L. chinense</i>   | Huang Shan (HS)     | Li.ch-HS-001  | Illumina, PE  | 500              | 24.68 | 15.14     | 3,334,715  | 5,308,884    |
| <i>L. chinense</i>   | Lu Shan_1 (LS_1)    | Li.ch-LS-001  | Illumina, PE  | 500              | 26.16 | 16.04     | 3,048,443  | 5,192,742    |
| <i>L. chinense</i>   | Lu Shan_2 (LS_2)    | Li.ch-LS-002  | Illumina, PE  | 500              | 27.27 | 16.73     | 3,459,852  | 6,019,021    |
| <i>L. chinense</i>   | Wuyi Shan (WYS)     | Li.ch-WYS-001 | Illumina, PE  | 500              | 27.87 | 17.09     | 3,286,118  | 5,992,413    |
| <i>L. tulipifera</i> | North Carolina (NC) | Li.tu-NC-001  | Illumina, PE  | 500              | 53.72 | 32.95     | 69,018     | 12,012       |
| <i>L. tulipifera</i> | Missouri (MO)       | Li.tu-MO-001  | Illumina, PE  | 500              | 53.2  | 32.63     | 69,785     | 10,024       |
| <i>L. tulipifera</i> | Tennessee (TN)      | Li.tu-TN-001  | Illumina, PE  | 500              | 52.51 | 32.21     | 54,388     | 9,301        |
| <i>L. tulipifera</i> | Georgia (GA)        | Li.tu-GA-001  | Illumina, PE  | 500              | 49.05 | 30.09     | 53,708     | 8,589        |
| <i>L. tulipifera</i> | Louisiana (LA)      | Li.tu-LA-001  | Illumina, PE  | 500              | 57.35 | 35.18     | 86,073     | 16,233       |

---

|                      |                 |              |                 |     |      |      |         |        |
|----------------------|-----------------|--------------|-----------------|-----|------|------|---------|--------|
| <i>L. tulipifera</i> | Ontario<br>(ON) | Li.tu-ON-001 | Illumina,<br>PE | 350 | 40.9 | 72.6 | 291,180 | 47,119 |
|----------------------|-----------------|--------------|-----------------|-----|------|------|---------|--------|

---

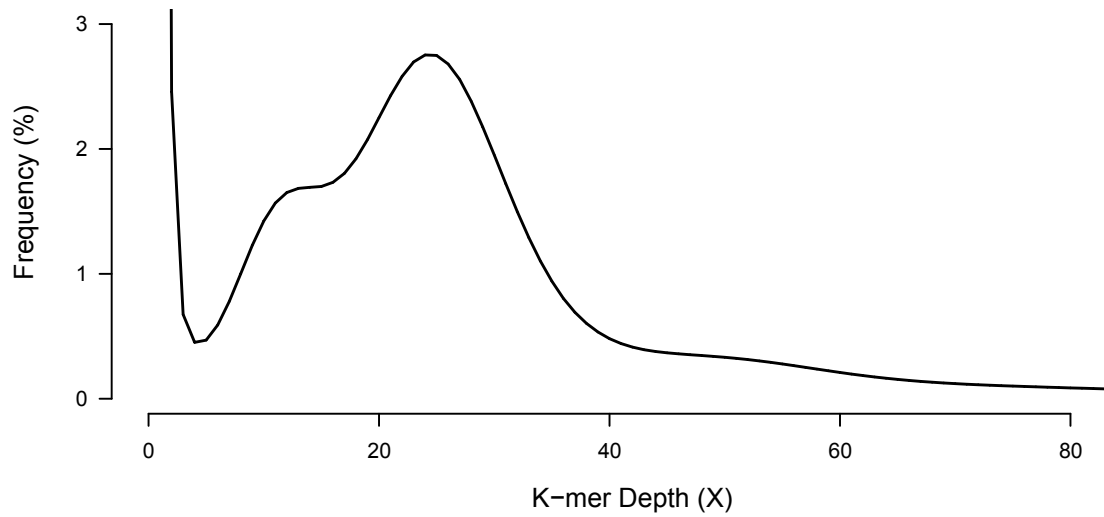

**Supplementary Figure 1. k-mer frequency distribution.**

The frequency and sequencing depth of 17 k-mer were plotted. Genome size was estimated using the primary peak depth and the heterozygous rate was estimated according to the second peak.

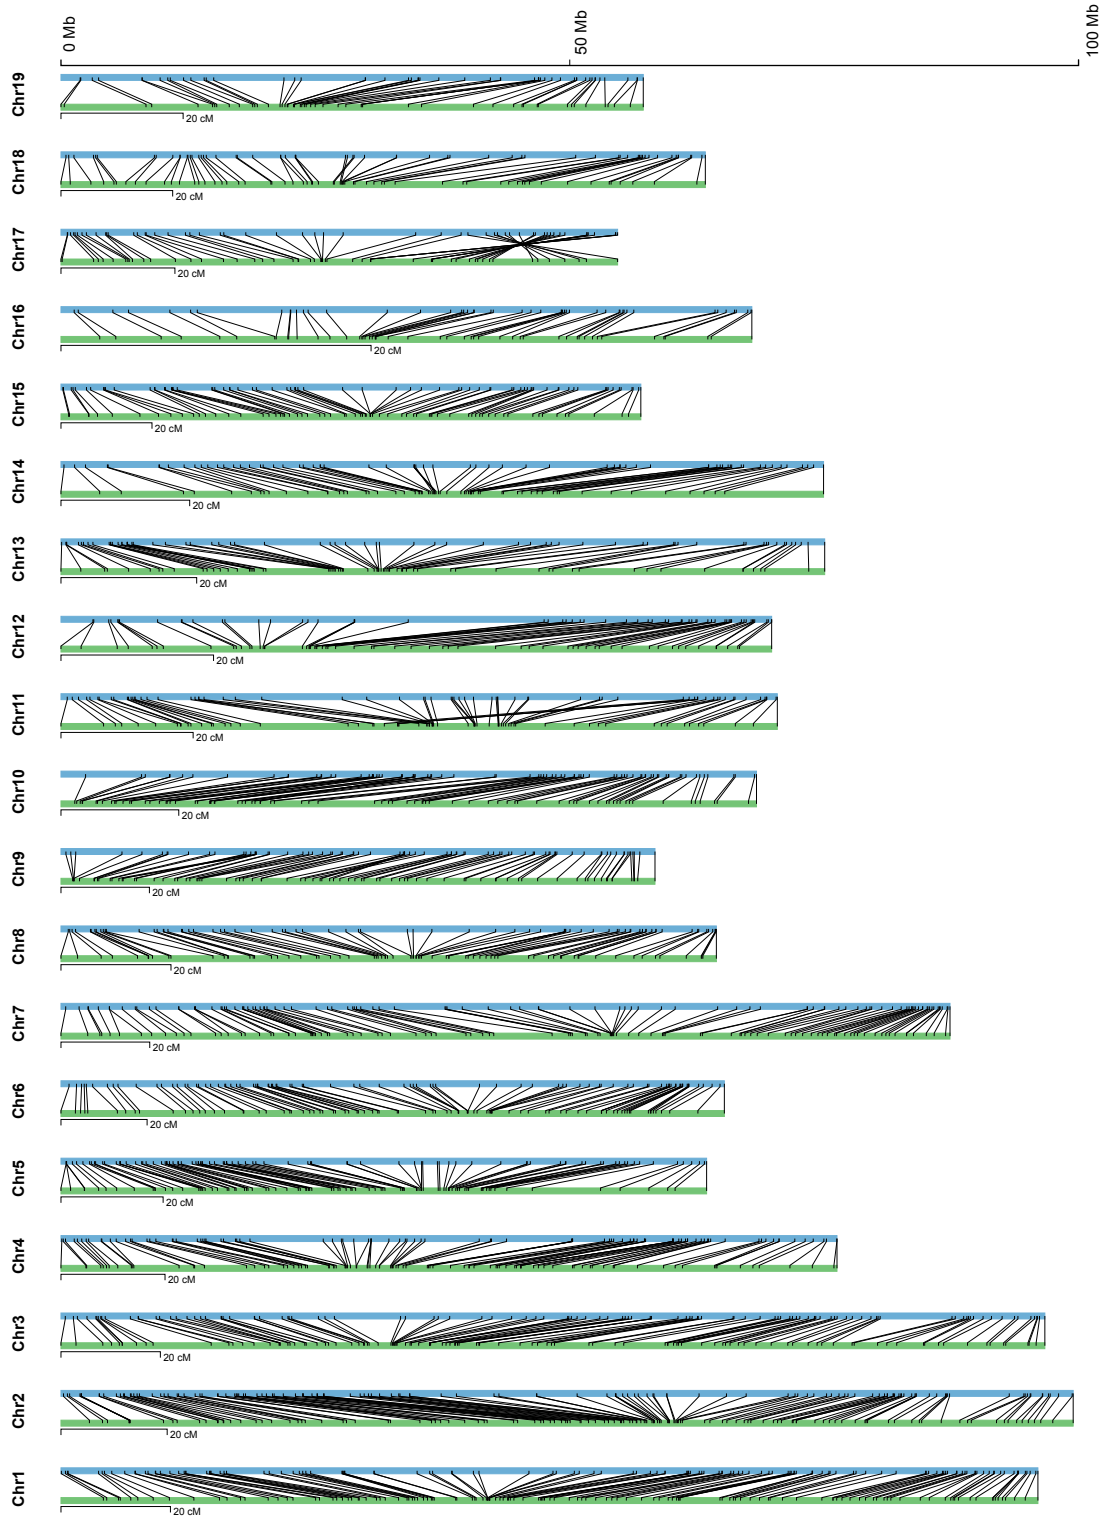

**Supplementary Figure 2. Linkage map of 19 *Liriodendron* pseudo-chromosomes.**

The linkage map of *Liriodendron* was constructed using RAD-based SNP makers identified from 150 F1 seedlings. The green bar indicates the genetic distance with a scale of 20 cM beneath each bar, and blue bar indicates the genome sequence with a corresponding scale on the top.

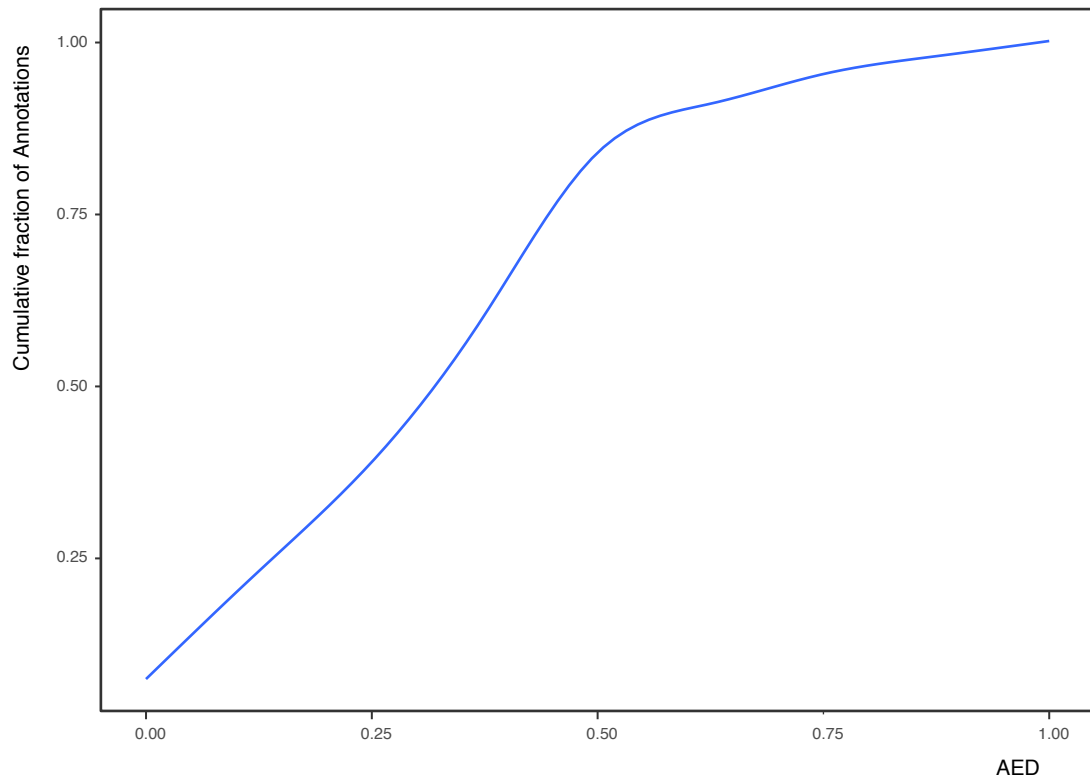

**Supplementary Figure 3. Cumulative AED distributions for the *Liriodendron* genome.**

Annotation Edit Distance (AED) provides a measurement for how well an annotation agrees with overlapping aligned ESTs, mRNA-seq and protein homology data. AED values range from 0 and 1, with 0 denoting perfect agreement of the annotation to aligned evidence, and 1 denoting no evidence support for the annotation.

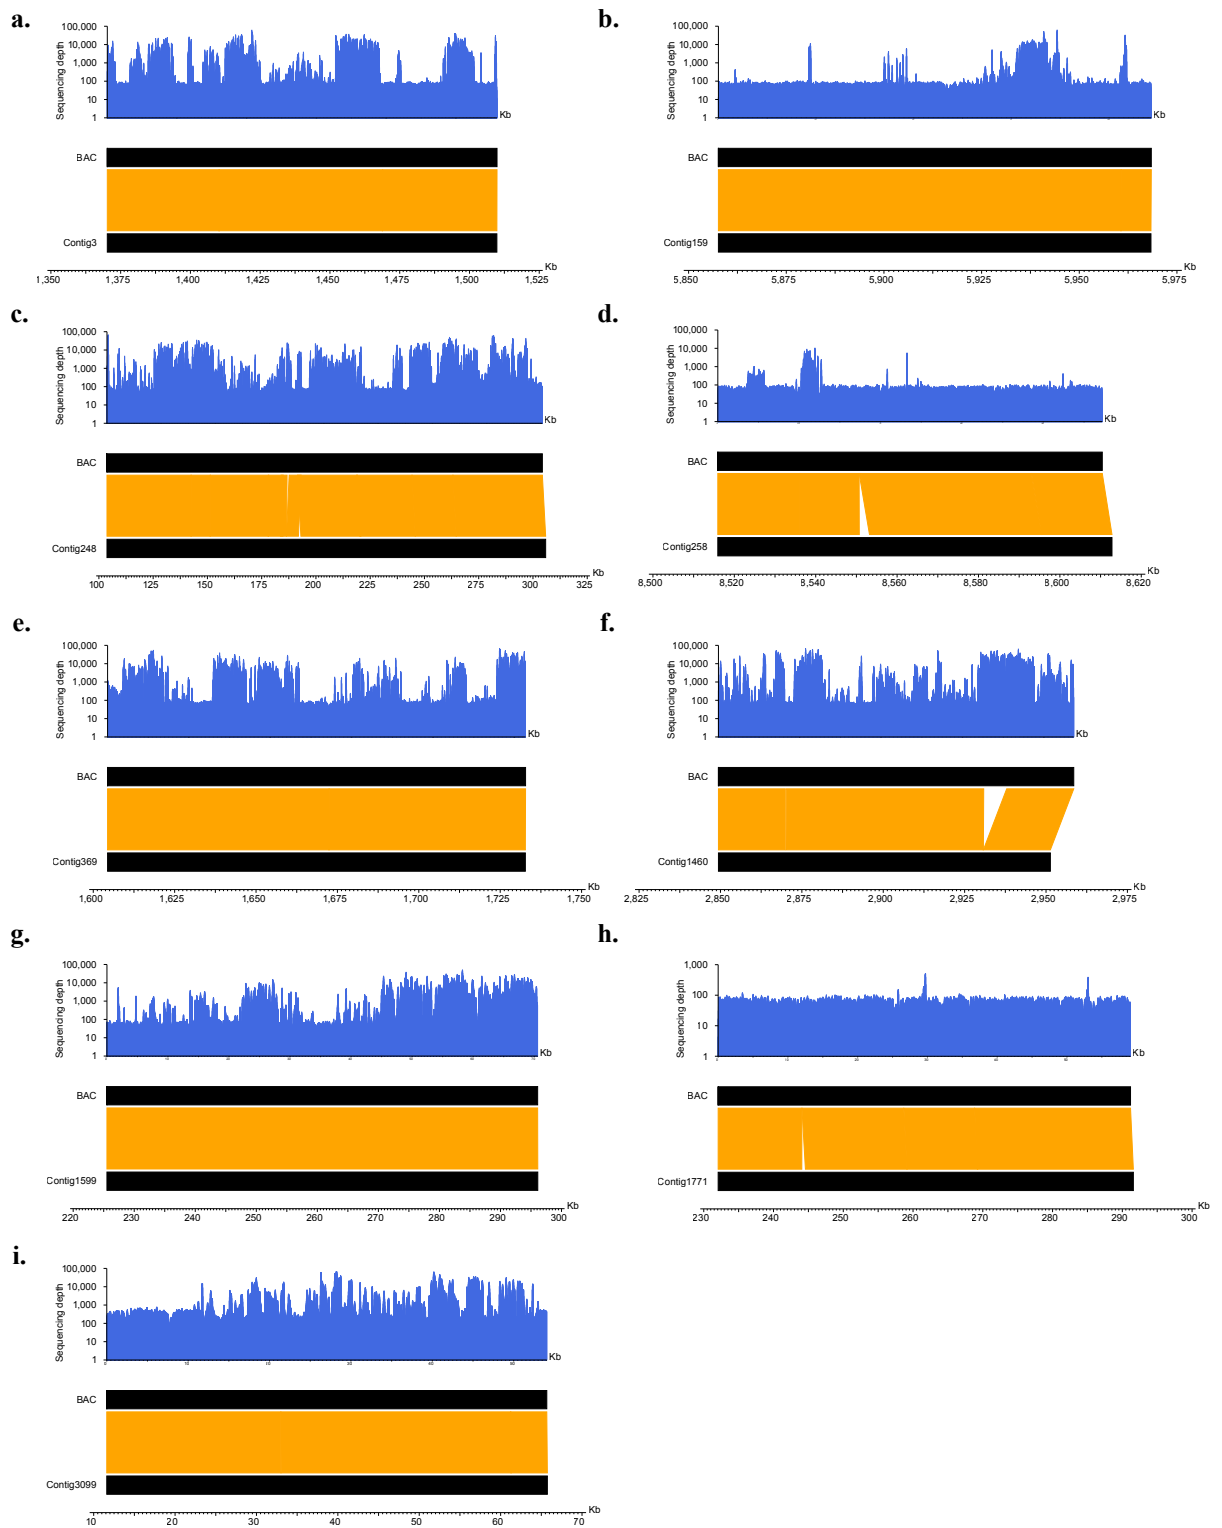

#### Supplementary Figure 4. Assembly quality control by assembled pooled BACs.

We assembled 89 BAC sequences and mapped these BACs back to the genome assembly. Nine random alignments that indicate a low error rate are shown here. Most of the BAC sequences were covered and fewer gaps were observed in these BAC sequences than in the genome assembly.

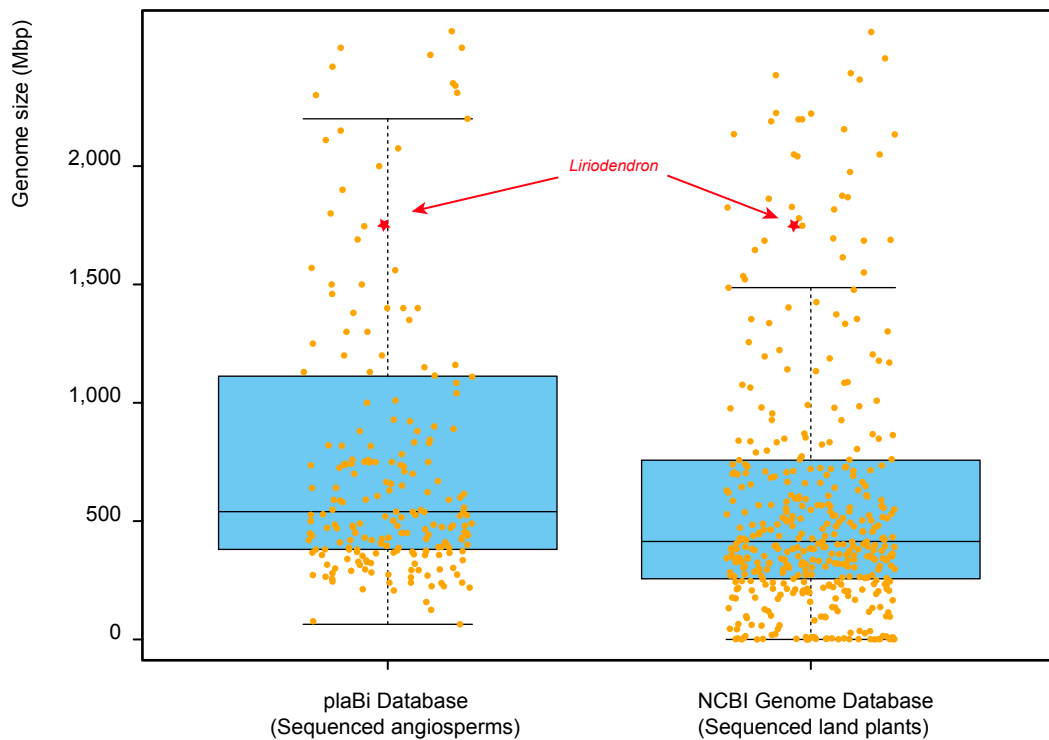

**Supplementary Figure 5. Comparison of the genome size of *Liriodendron* with other sequenced plants.**

The size of *Liriodendron* genome was estimated to be 1.75 Gb. Genome sizes of all sequenced angiosperms and all sequenced land plants were separately extracted from the plaBi Database (<http://plabipd.de/index.ep>) and the NCBI Genome Database (<https://www.ncbi.nlm.nih.gov/home/genomes/>). The genome size ranged from 64 Mb to 17,000 Mb with a mean value of 1,075.78 Mb in the plaBi Database and from 0.02 Mb to 27,602 Mb with a mean value of 1,060.38 Mb in the NCBI Genome Database. The genome size of *Liriodendron* was greater than those of 193 (84.65%) sequenced angiosperms and 403 (88.18%) sequenced land plants in these two databases, respectively.!



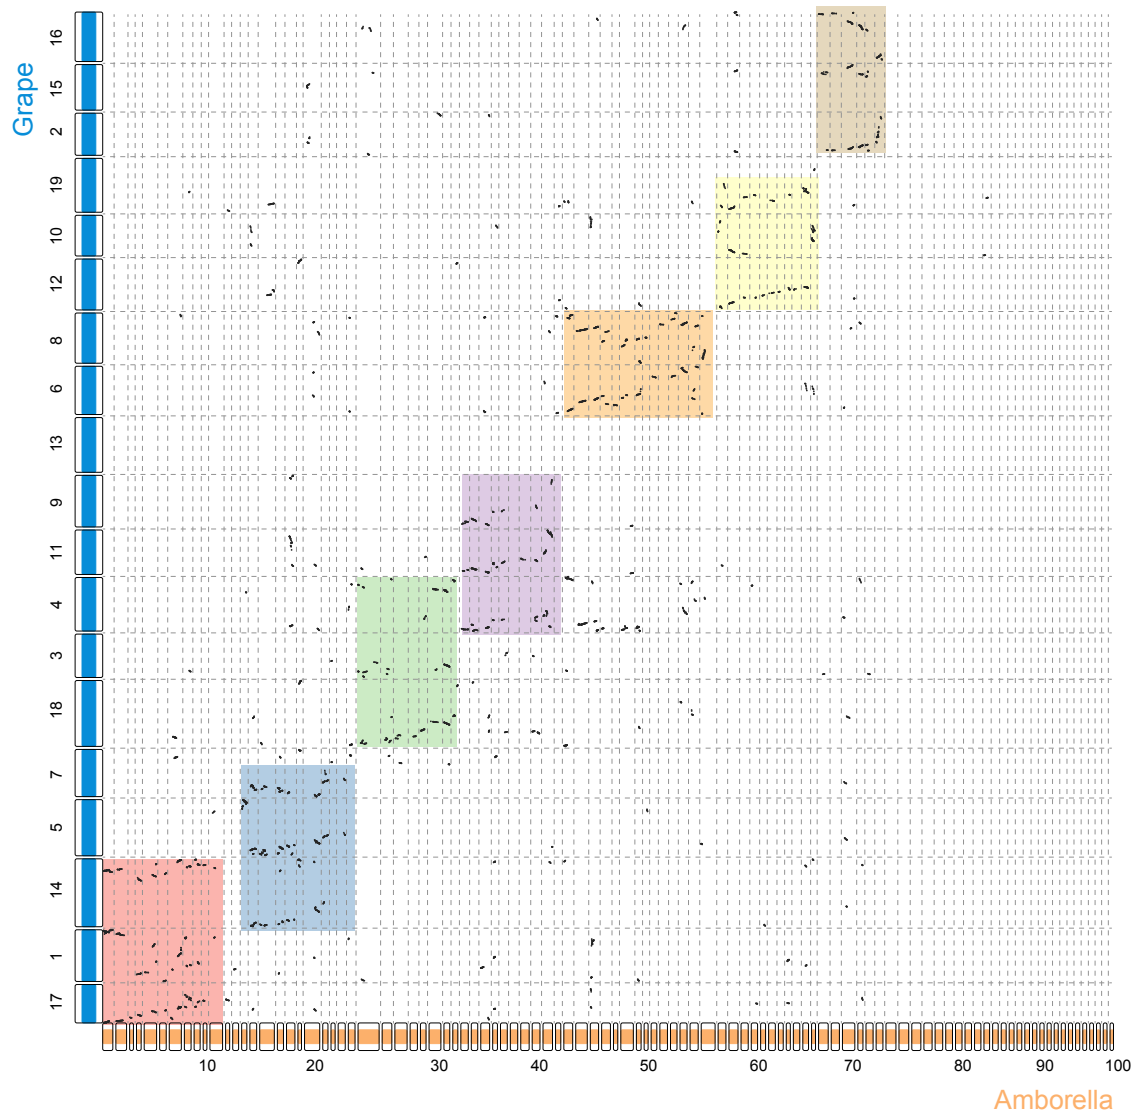

**Supplementary Figure 6. Syntenic path dotplot of *Amborella* versus *Vitis*.**

The y-axis represents the 19 *Vitis* chromosomes, the x-axis represents the *Amborella* scaffolds. Only the one hundred longest scaffolds were used. The *Vitis* chromosomes and *Amborella* scaffolds have been separately reordered to illustrate the 3:1 syntenic depth relationship in the comparison of *Vitis* to *Amborella* as much as possible.

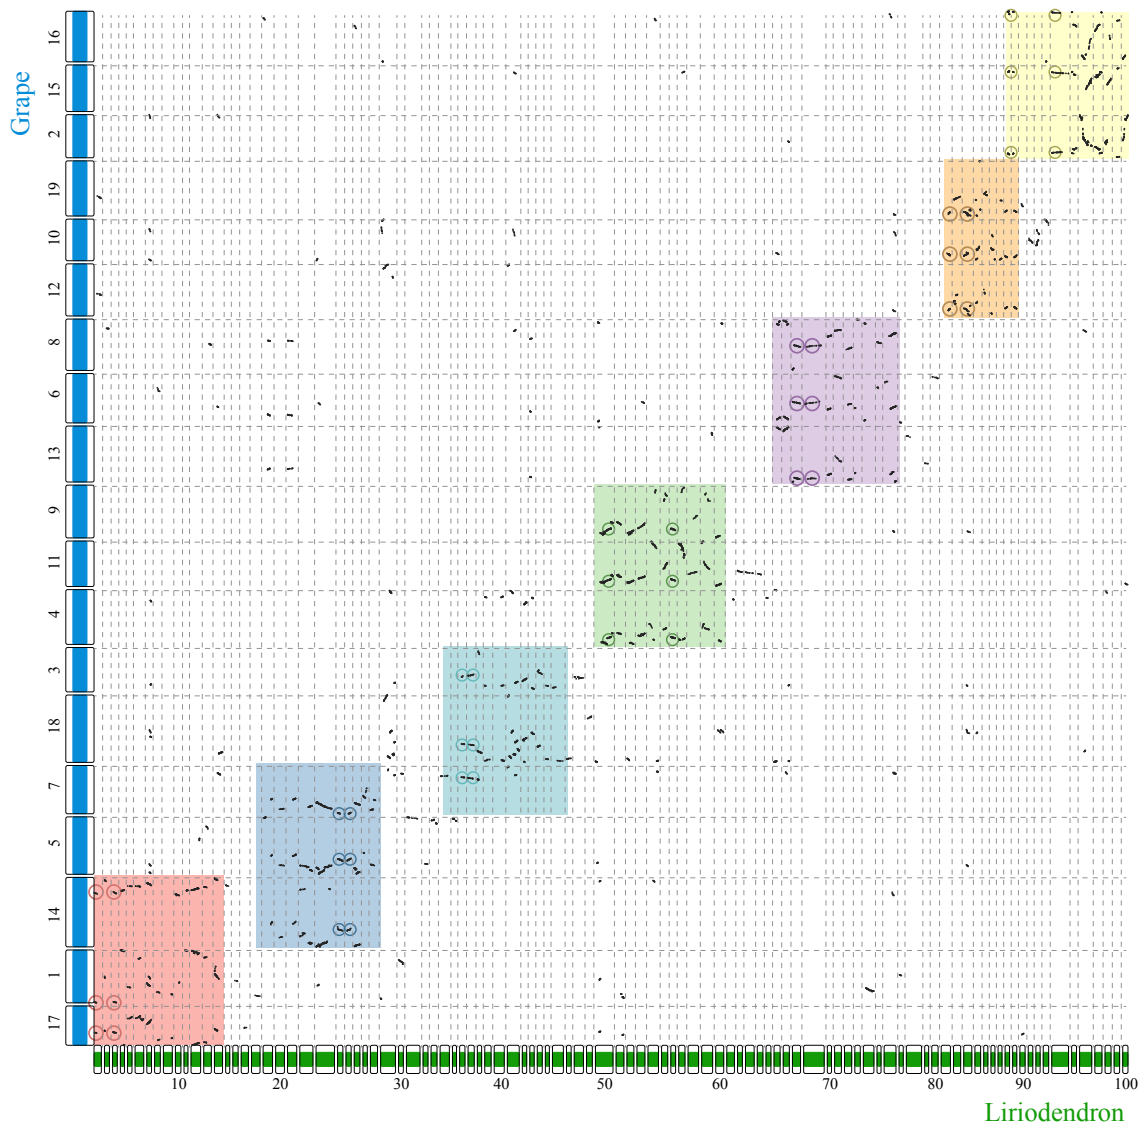

**Supplementary Figure 7. Syntenic path dotplot of *Liriodendron* versus *Vitis*.** The y-axis represents the 19 *Vitis* chromosomes, the x-axis represents the one hundred longest scaffolds of *Liriodendron*. The *Vitis* and *Liriodendron* scaffolds have been separately reordered to illustrate the 3:2 syntenic depth relationship in the comparison of *Vitis* to *Liriodendron* as much as possible.

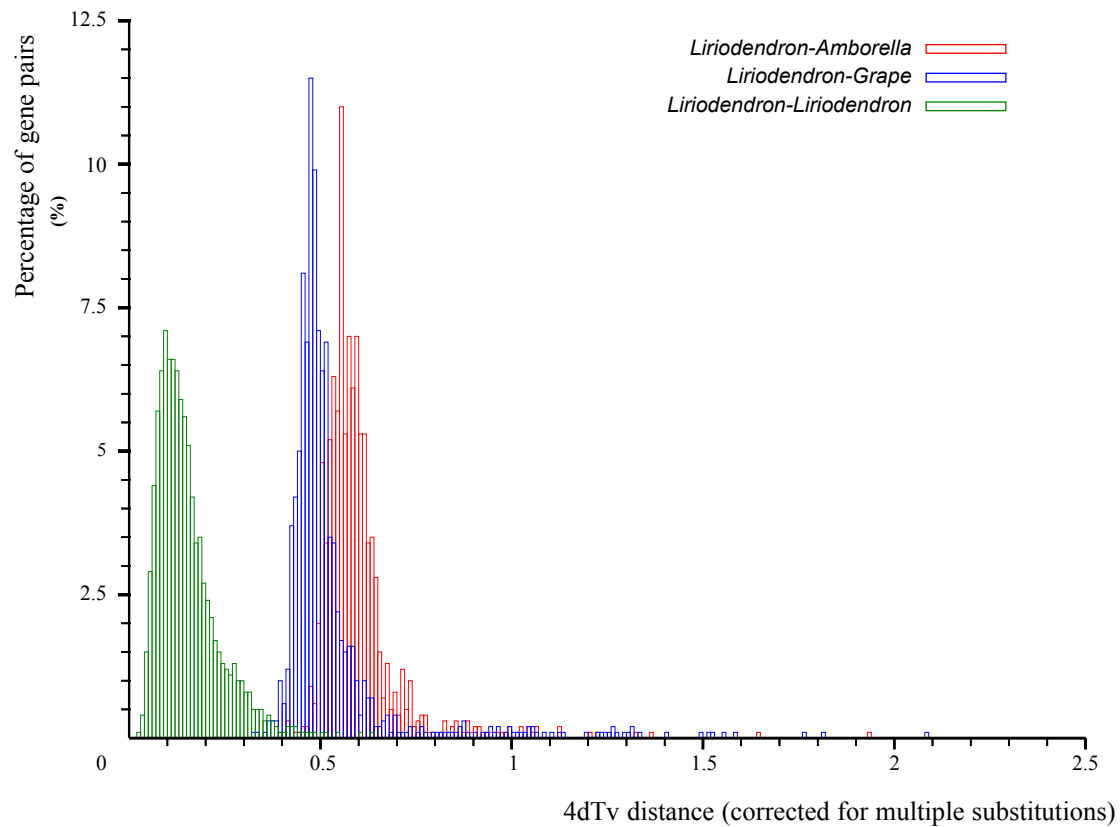

**Supplementary Figure 8. 4DTV-based age distribution in *Liriodendron-Liriodendron*, *Liriodendron-Amborella* and *Liriodendron-Vitis*.**

The X-axis shows the 4DTV values (with a bin of 0.05), while the Y-axis shows the number of paralogous gene pairs. The peak in *Liriodendron-Liriodendron* is 0.25 corresponding to 75~77 Mya referring to the splitting time between *Liriodendron* and *Amborella* (~180 Mya with a peak of 0.6) and grape (~154 Mya with a peak of 0.5).

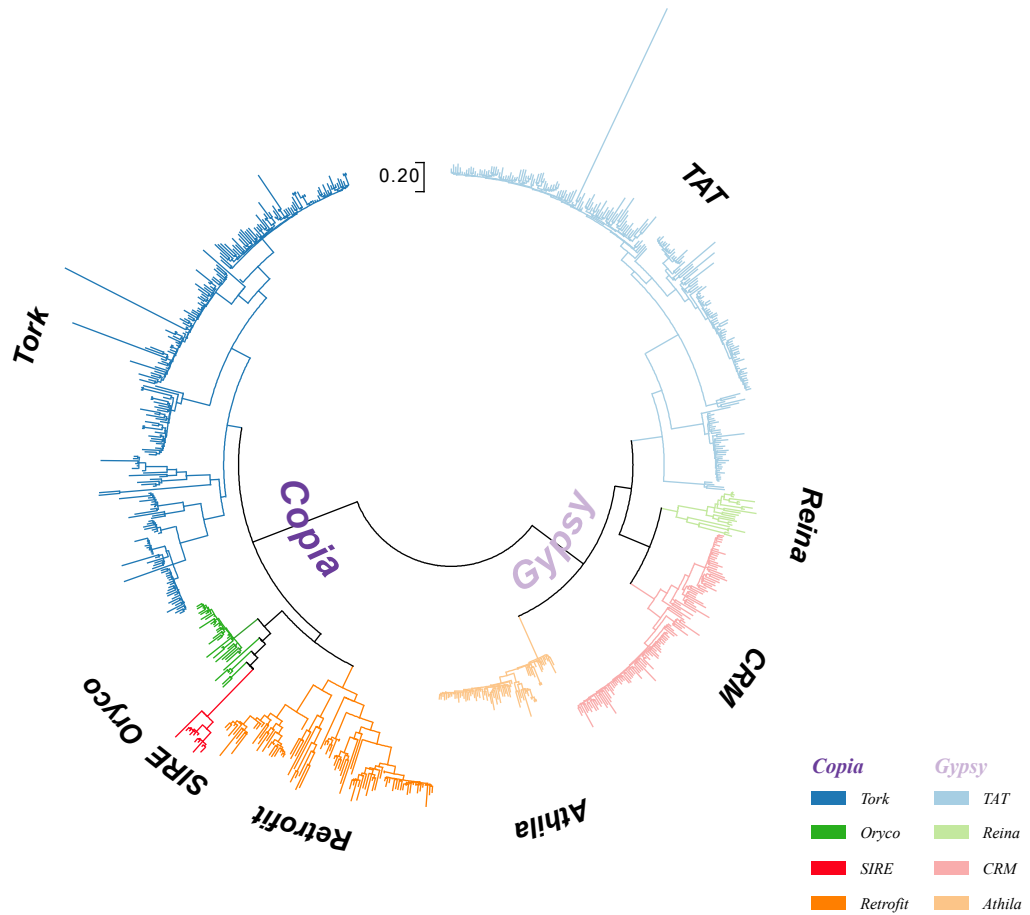

**Supplementary Figure 9. Phylogenetic analysis of *Liriodendron* LTR retrotransposons.**

The unrooted phylogenetic tree of *Gypsy* and *Copia* elements was constructed on the basis of the reverse-transcriptase domain sequences. The scale on the top indicates 0.2 substitution per site.

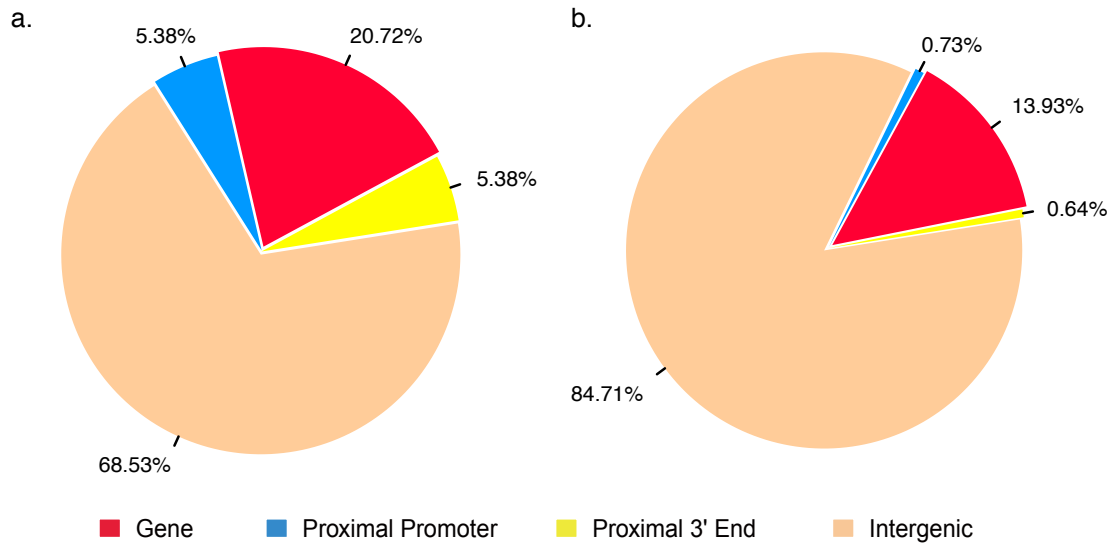

**Supplementary Figure 10. An uneven TE distribution across the *Liriodendron* genome.**

The pie graph demonstrates four separate *Liriodendron* genomic regions, i.e., gene (red), proximal promoter (blue), proximal 3' end (yellow) and intergenic regions (orange) accounted for the proportion of the *Liriodendron* genome (a) and TEs present in these four regions accounted for the proportion of total TEs (b). Among the TEs present in *Liriodendron* genome, 84.71% (2,834,477) located in intergenic regions, 0.73% (24,426) located in proximal promoter, 13.93% (466,111) located in genic regions and the rest 0.63% (21,081) located in proximal 3' end. If TEs are randomly distributed in *Liriodendron* genome, then the expected TE proportion of these four separate genomic regions should be the same to the proportion accounted for by these four regions in the *Liriodendron* genome, i.e., 68.52% (2,292,744), 5.38% (180,020), 20.72% (693,311) and 5.38% (180,020). Anyway, the chi-square test between the observed and expected TEs ( $\chi^2 = 477,260$ , p-value = 0) showed an obvious difference.

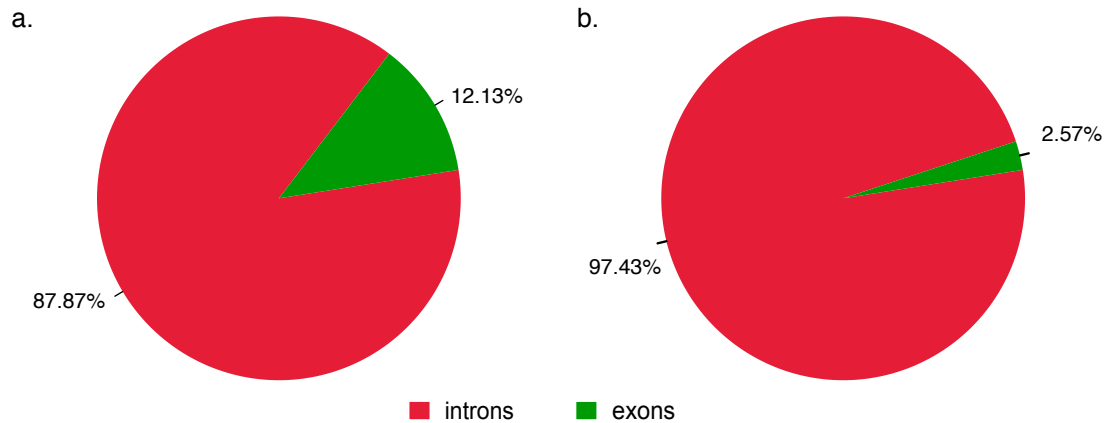

**Supplementary Figure 11. TE distribution in genic regions.**

The pie graph demonstrates two separate *Liriodendron* genic regions, i.e., introns (red) and exons (green) accounted for the proportion of the *Liriodendron* genic regions (a) and TEs present in these two regions accounted for the proportion of total TEs contained in genic regions (b). Among the TEs present in genic regions (with a total number of 466,111), 2.57% (11,994) located in exons and 97.43% (454,117) located in introns. If TEs are randomly distributed in genic regions, then the expected number of TEs contained in exons and introns should be 56,539.30 and 409,571.7 due to the proportion accounted for by these two regions in the *Liriodendron* genic regions. Anyway, the chi-square test between the observed and expected number ( $\chi^2 = 39,940$ , p-value = 0) showed an obvious difference. The observed number of TEs located in exons is smaller than the expected number, and by contrast, the observed number of TEs located in introns is bigger than the expected number.

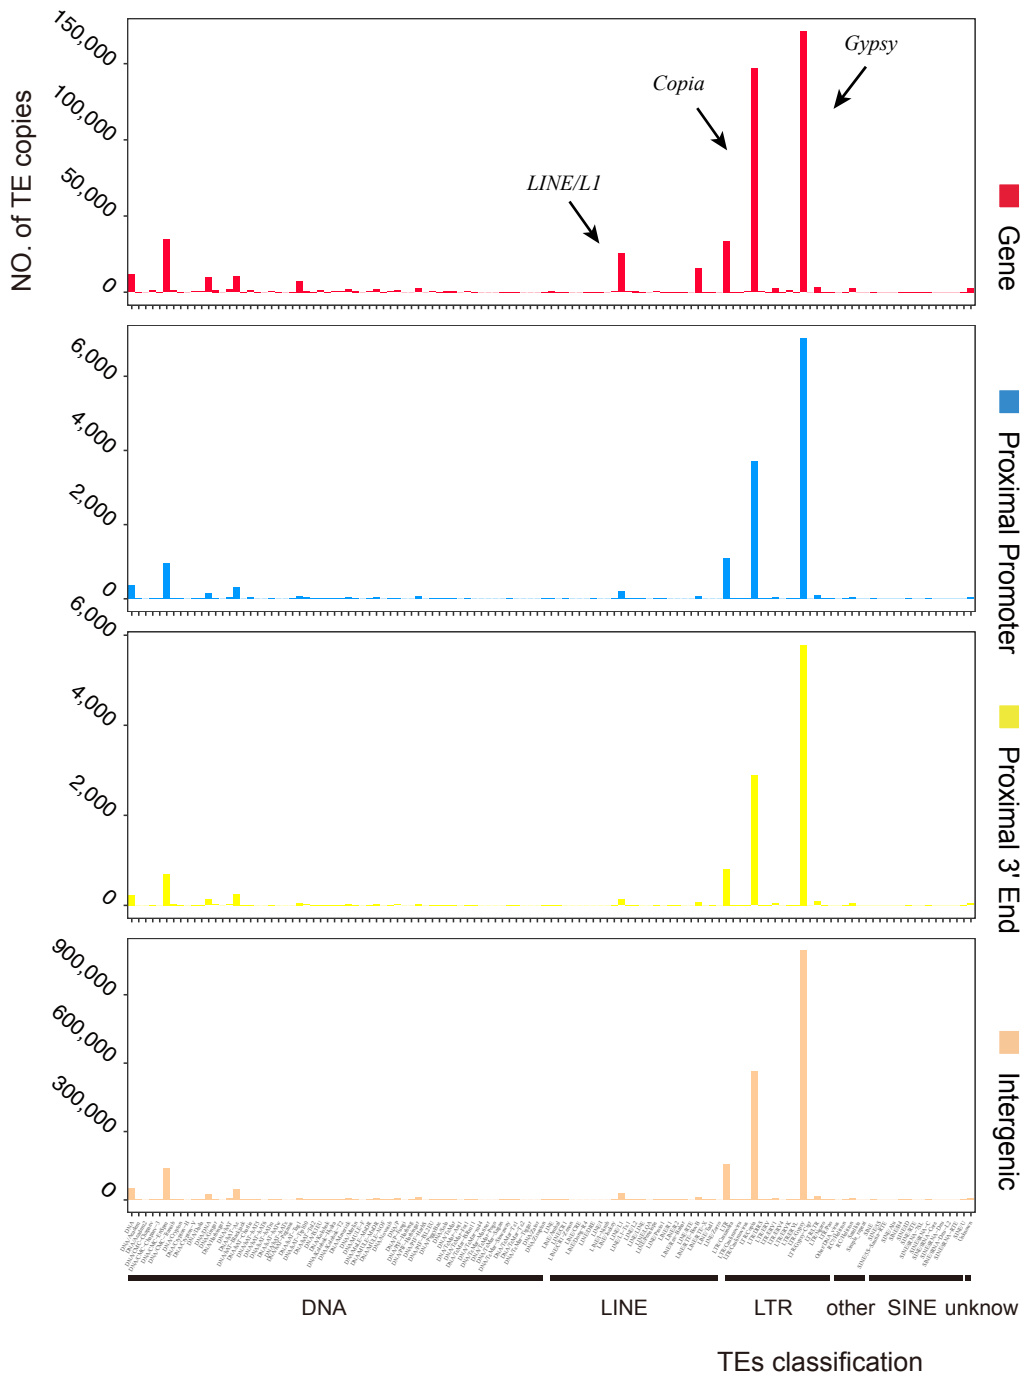

**Supplementary Figure 12. TE family distribution in different *Liriodendron* genomic regions.**

Within four *Liriodendron* genomic regions, TE copies of different families were separately counted and plotted. Arrows point to three TE families, which are *LINE/LI*, *Copia* and *Gypsy* from left to right.

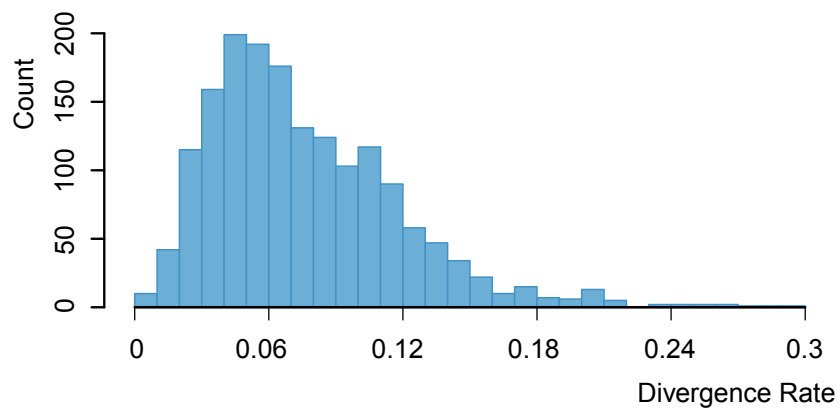

**Supplementary Figure 13. LTR insertion time estimation.**

*K<sub>s</sub>* distributions of the complete LTR in the *L. chinense* genome are plotted by a window of 0.01.



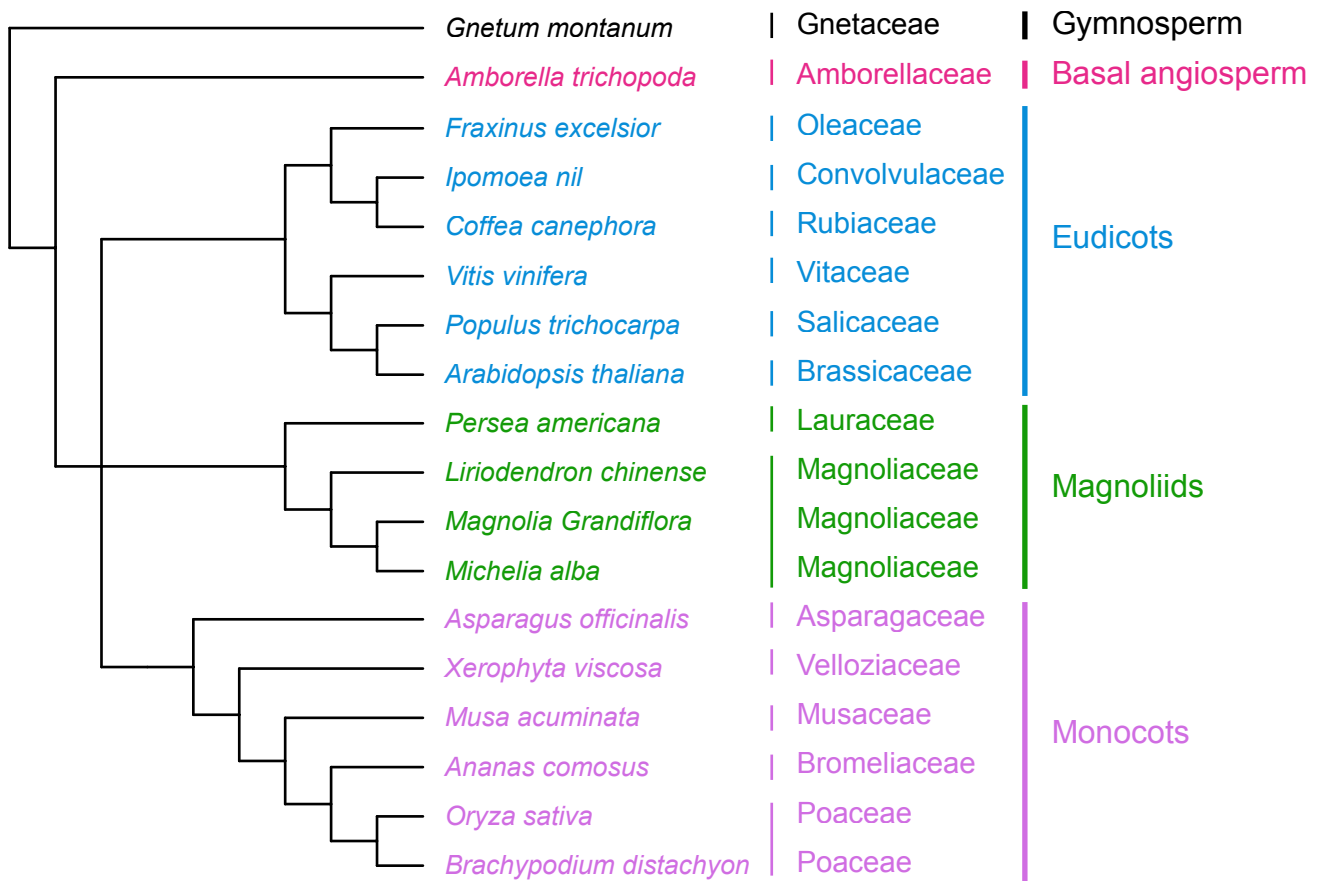

**Supplementary Figure 14. A cladogram depicting established relationships of 18 representative species.**

This tree was used as the reference for selecting suitable nuclear gene markers, with uncertain relationships collapsed.

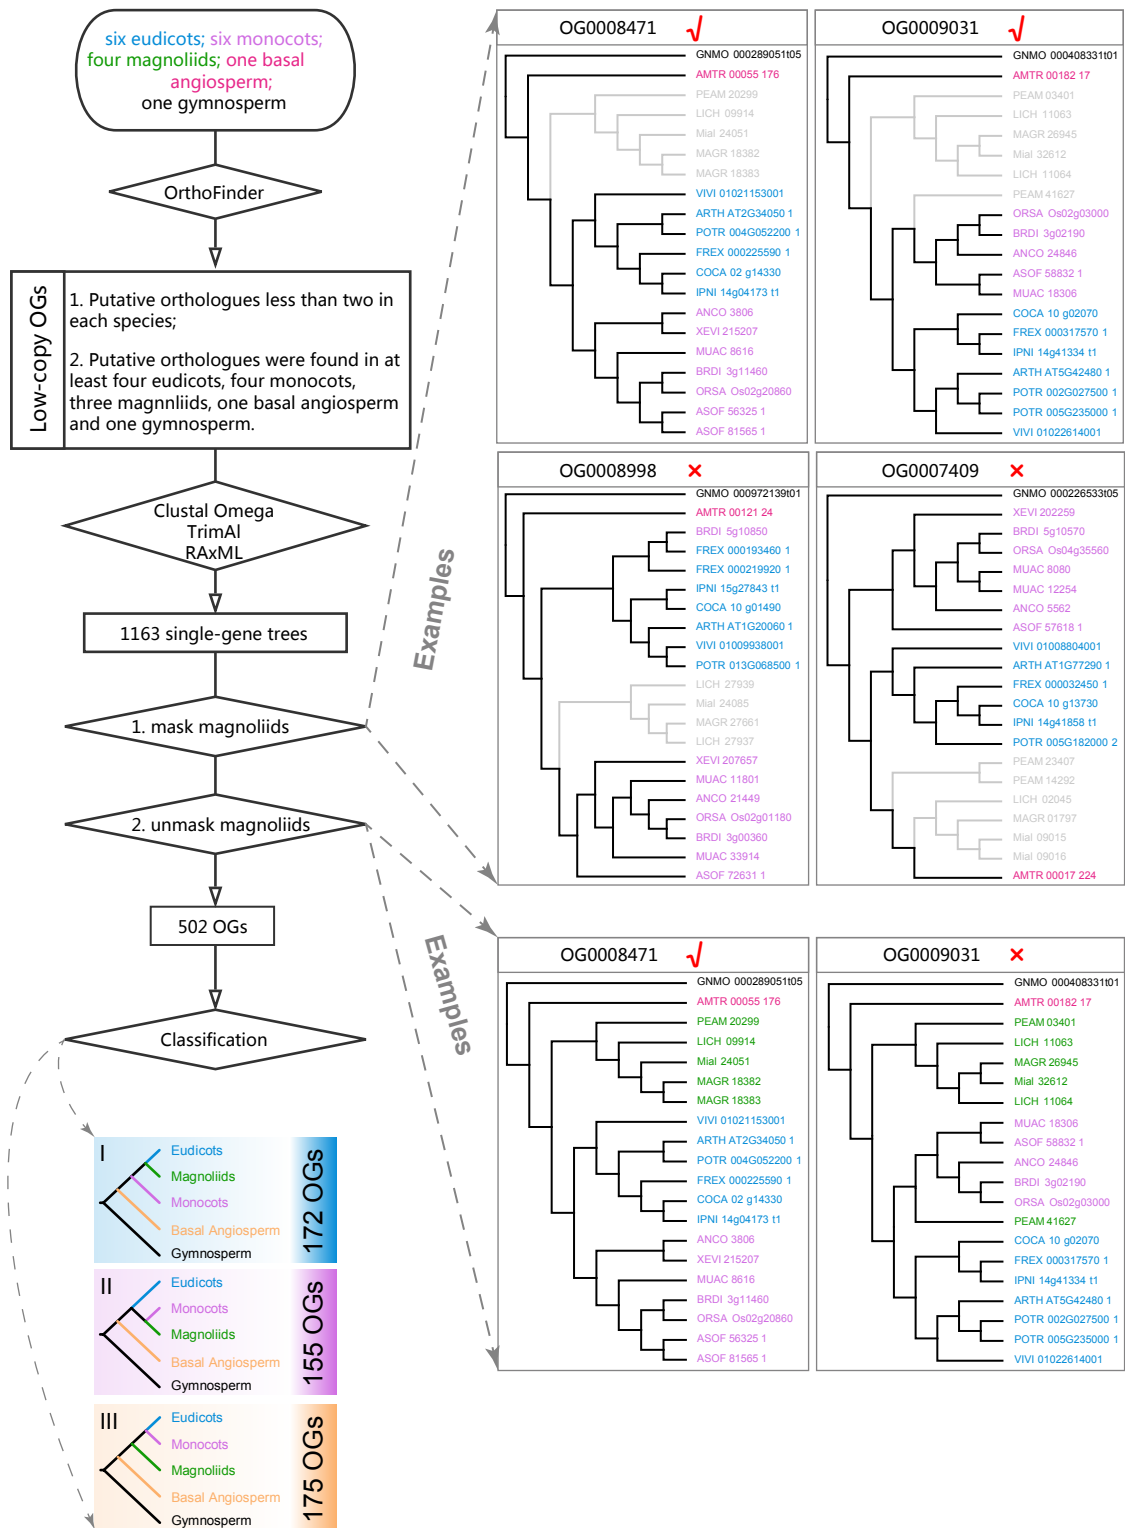

Supplementary Figure 15. The schematic flow of phylogenetic analysis and examples of single-gene trees selection.

a.

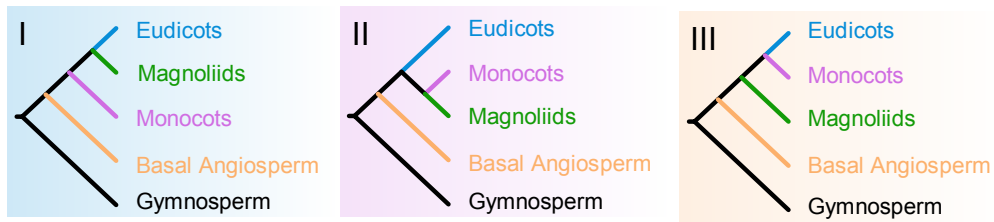

b.

| Topology            | Phylogenetic signal |
|---------------------|---------------------|
| I                   | 166                 |
| II                  | 167                 |
| III                 | 169                 |
|                     |                     |
| Chisq-test $\chi^2$ | 0.0279              |
| p-value             | 0.9862              |

**Supplementary Figure 16. The distribution of phylogenetic signal for three alternative topological hypotheses on the angiosperm lineage.**

(a) Three alternative topologies are: a clade of magnoliids and eudicots as the sister group to monocots; a clade of magnoliids and monocots as the sister group to eudicots; magnoliids as the sister group to the clade of eudicots and monocots. (b) Distribution of genes supporting each of three alternative hypotheses for the 502 low-copy OG dataset.

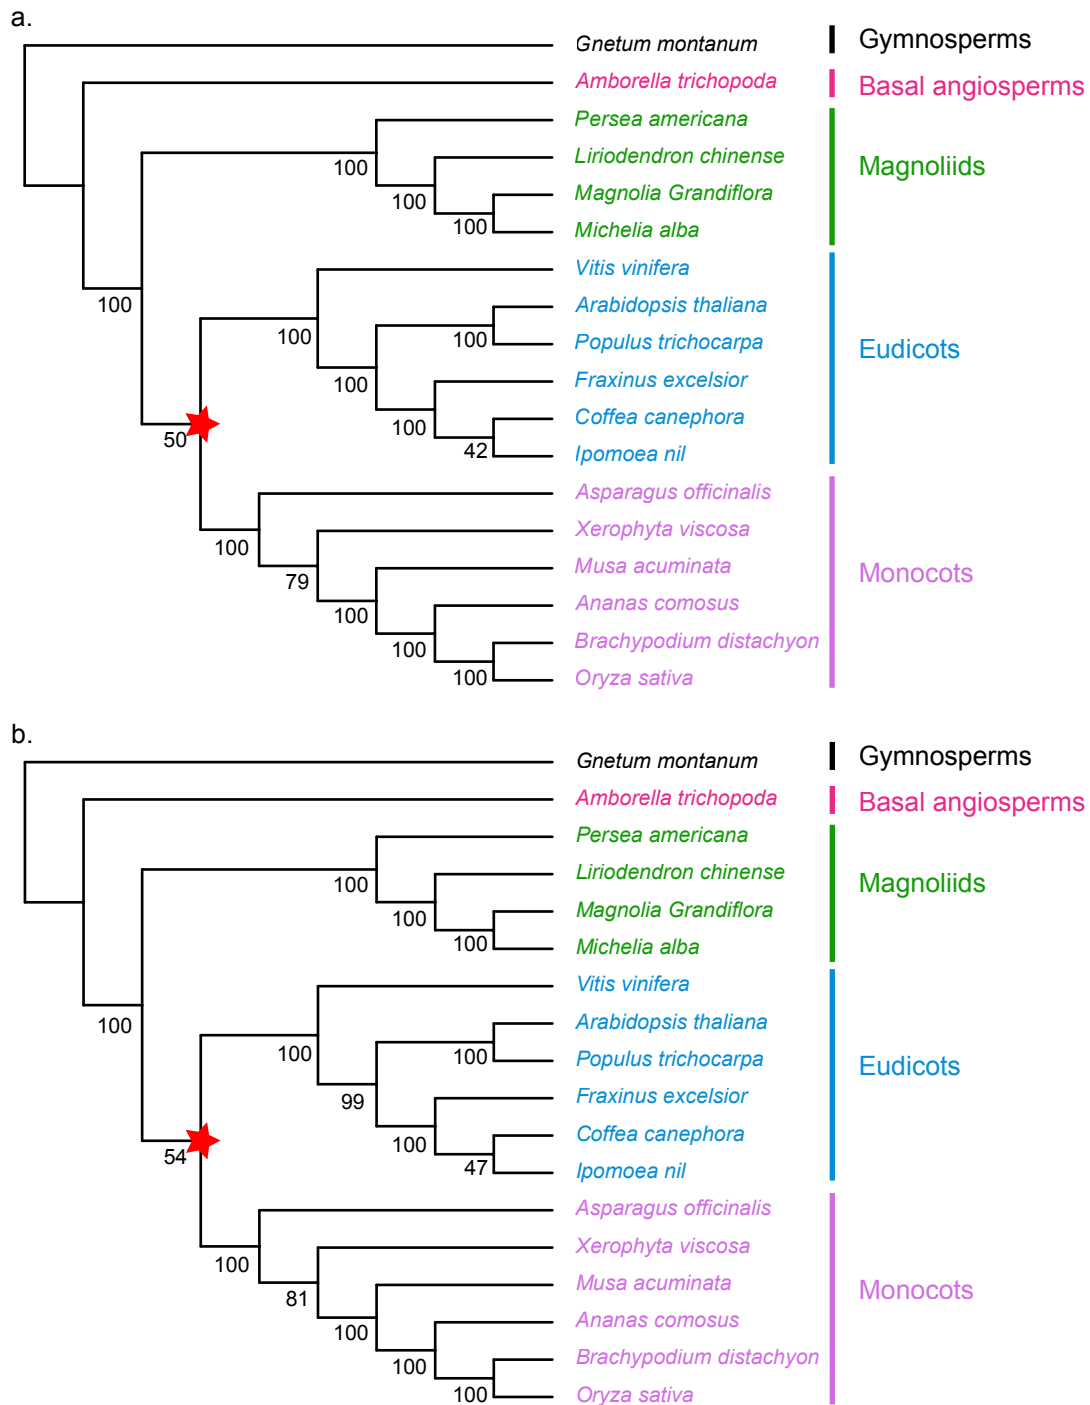

**Supplementary Figure 17. Phylogenetic trees based on the 502-OG and 481-OG datasets of 18 land plant species.**

(a) Protein sequences of 502 low-copy OGs were separately aligned, trimmed and used to infer single-gene phylogenies. Then, only the orthologue gene with the shortest branch length in each species was retained in each OGs for following species tree estimation using ASTRAL. (b) OGs with outlier  $\Delta$ GLS values were excluded and the remaining 481 OGs were used to estimate the species tree using ASTRAL. Numbers associated with nodes are bootstrap values.

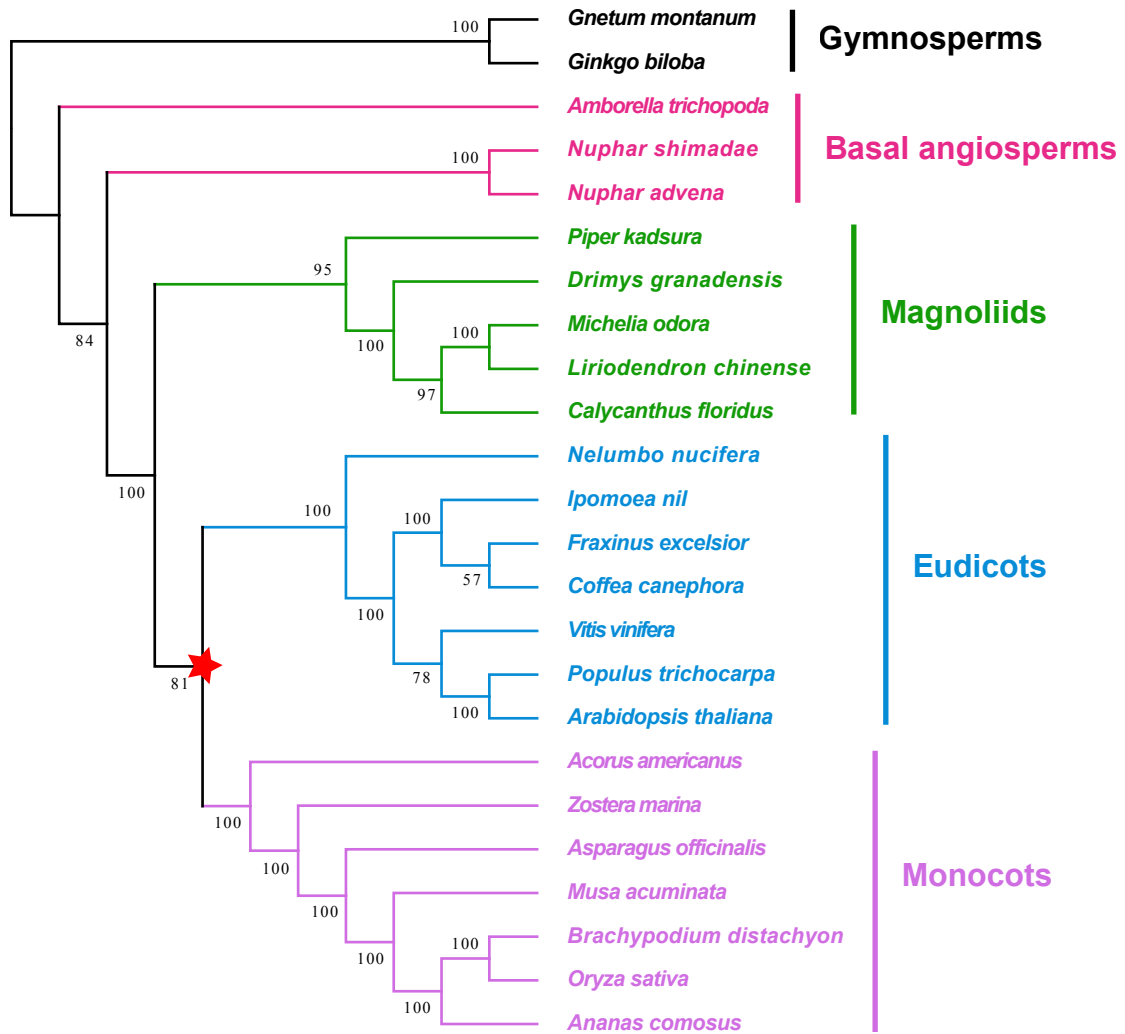

**Supplementary Figure 18. The phylogenetic tree based on 78 chloroplast genes from 24 species.**

The phylogenetic tree was constructed from 78 concatenated chloroplast gene sequences that were shared among 24 plant species using the ML method. Numbers associated with nodes are bootstrap values.

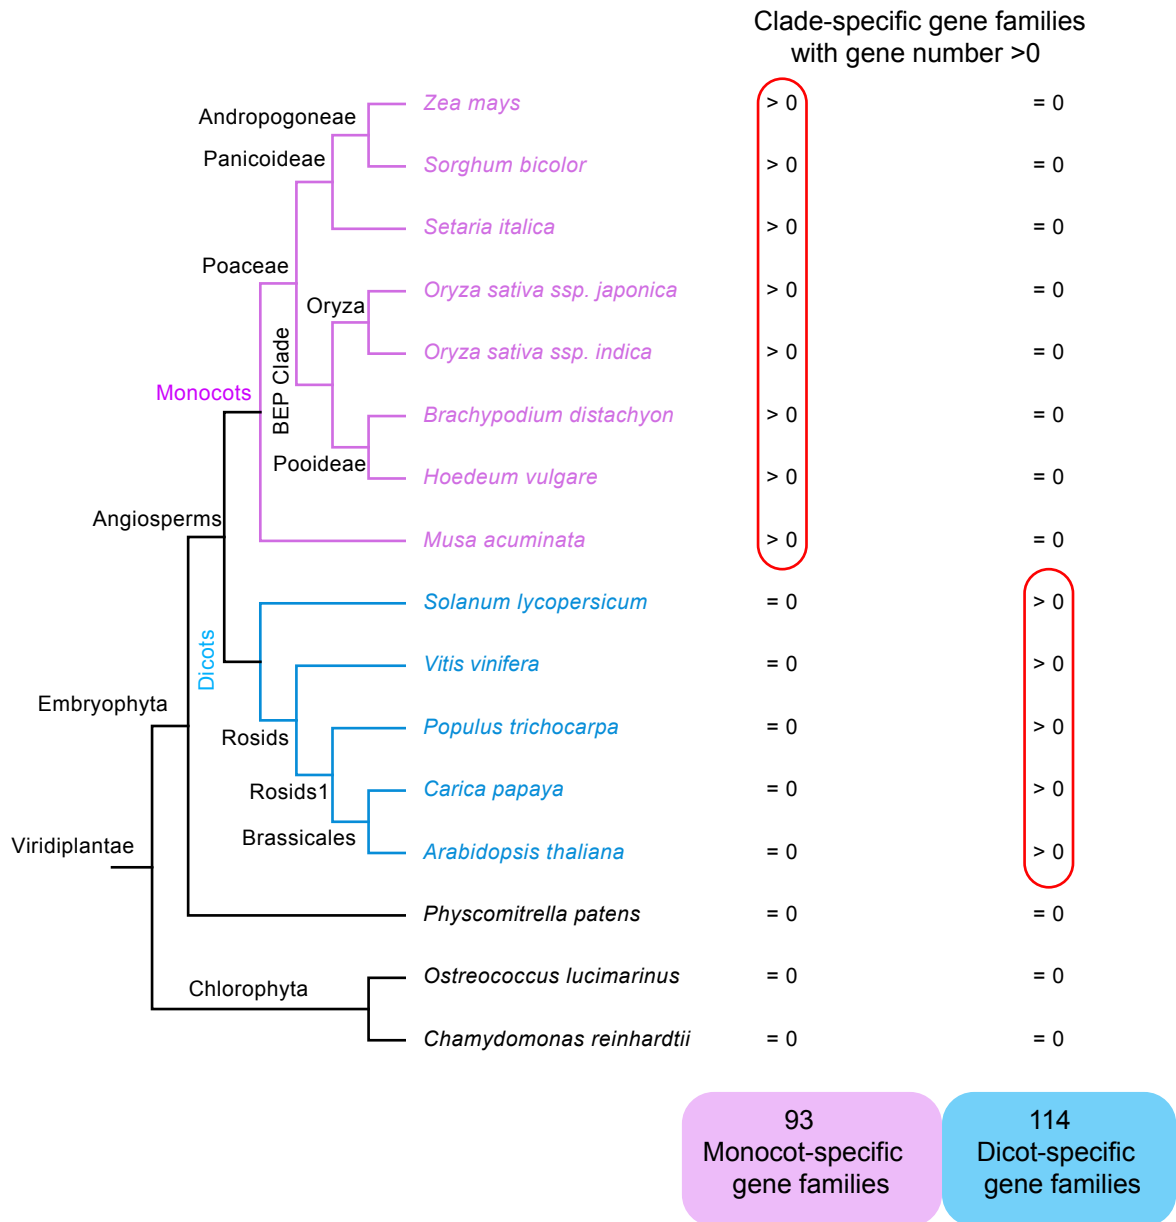

### Supplementary Figure 19. Monocot- and dicot-specific gene family selection.

We found monocot- and dicot-specific gene families based on phylogenetic profiles in the Monocots PLAZA 3.0 database. We manually selected all the species that came from the target clade, i.e., monocots or dicots, for identifying clade-specific gene families with all species included and setting the gene number =0 within nontarget clade species. Finally, we separately obtained 93 monocot- and 114 dicot-specific gene families.



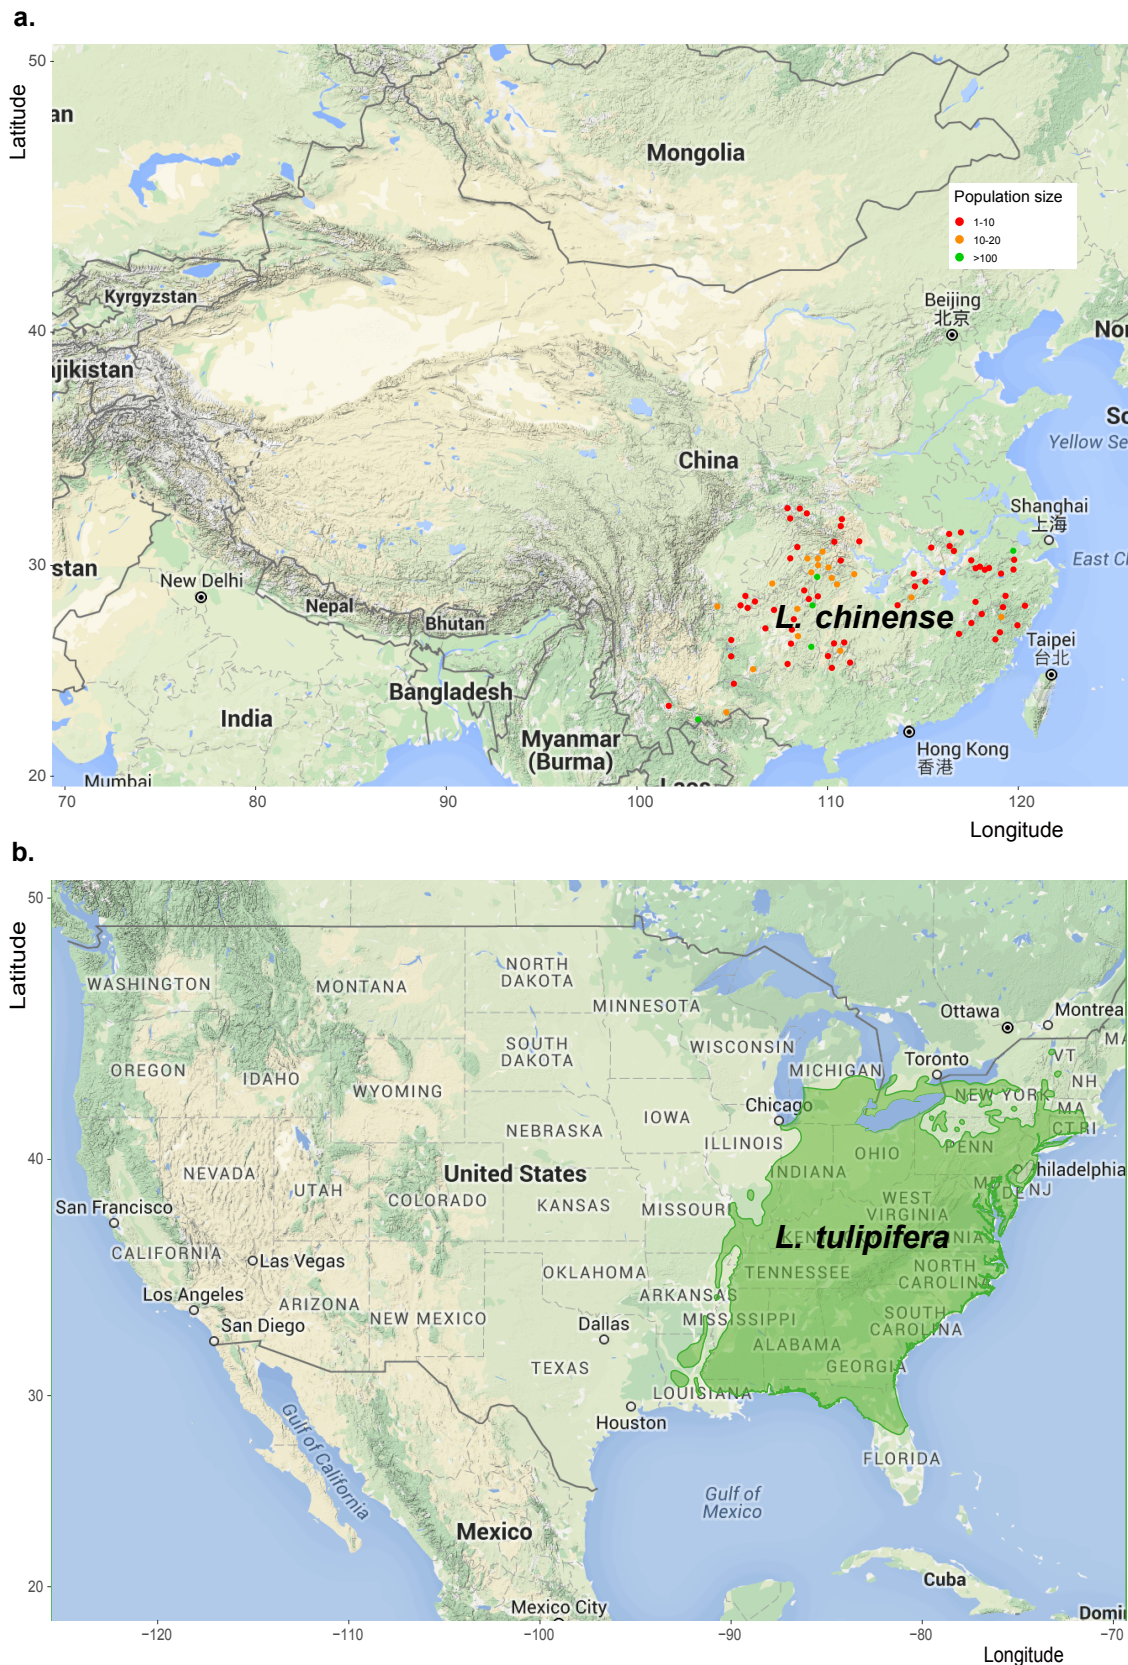

**Supplementary Figure 20. Natural distribution of the two *Liriodendron* species.**

The natural distribution maps of *L. chinense* (a) and *L. tulipifera* (b) were separately plotted. The *L. chinense* natural distribution data was obtained from Hao *et al.* (1995) and the *L. tulipifera* natural distribution data were downloaded from the Geosciences and Environmental Change Science Center (GECSE; <http://esp.cr.usgs.gov/>) database.

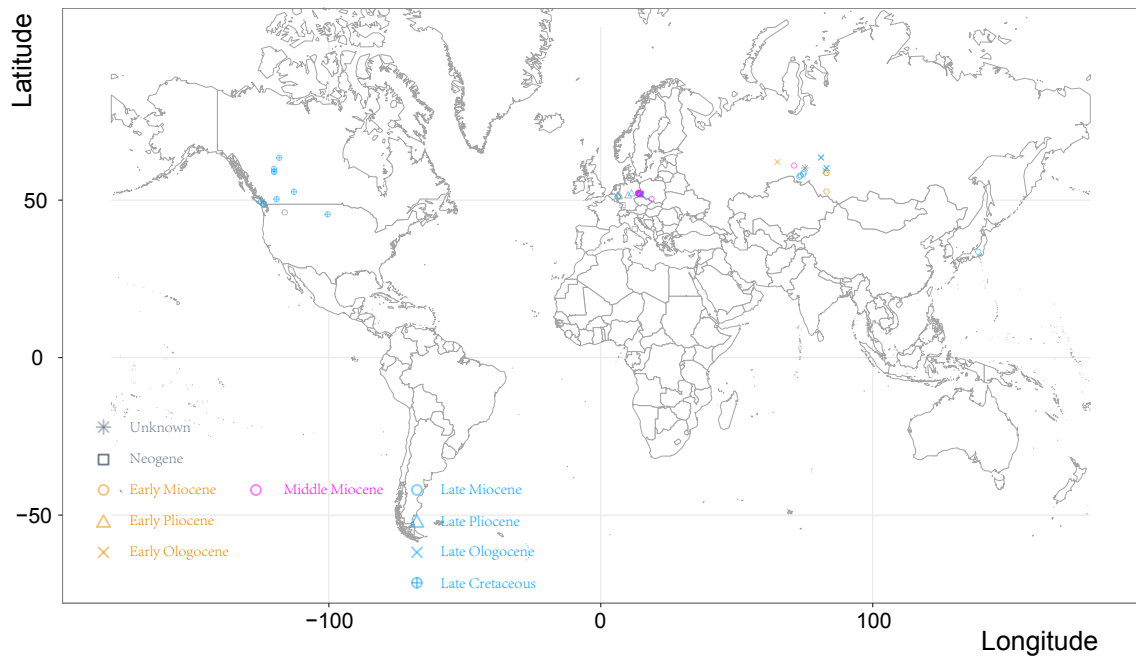

**Supplementary Figure 21. Distribution of extinct *Liriodendron* species in high-latitude regions before the Late Tertiary.**

Different colors and shape symbols represented different geological ages which were inferred from the fossils. The data were downloaded from the Fossilworks database.



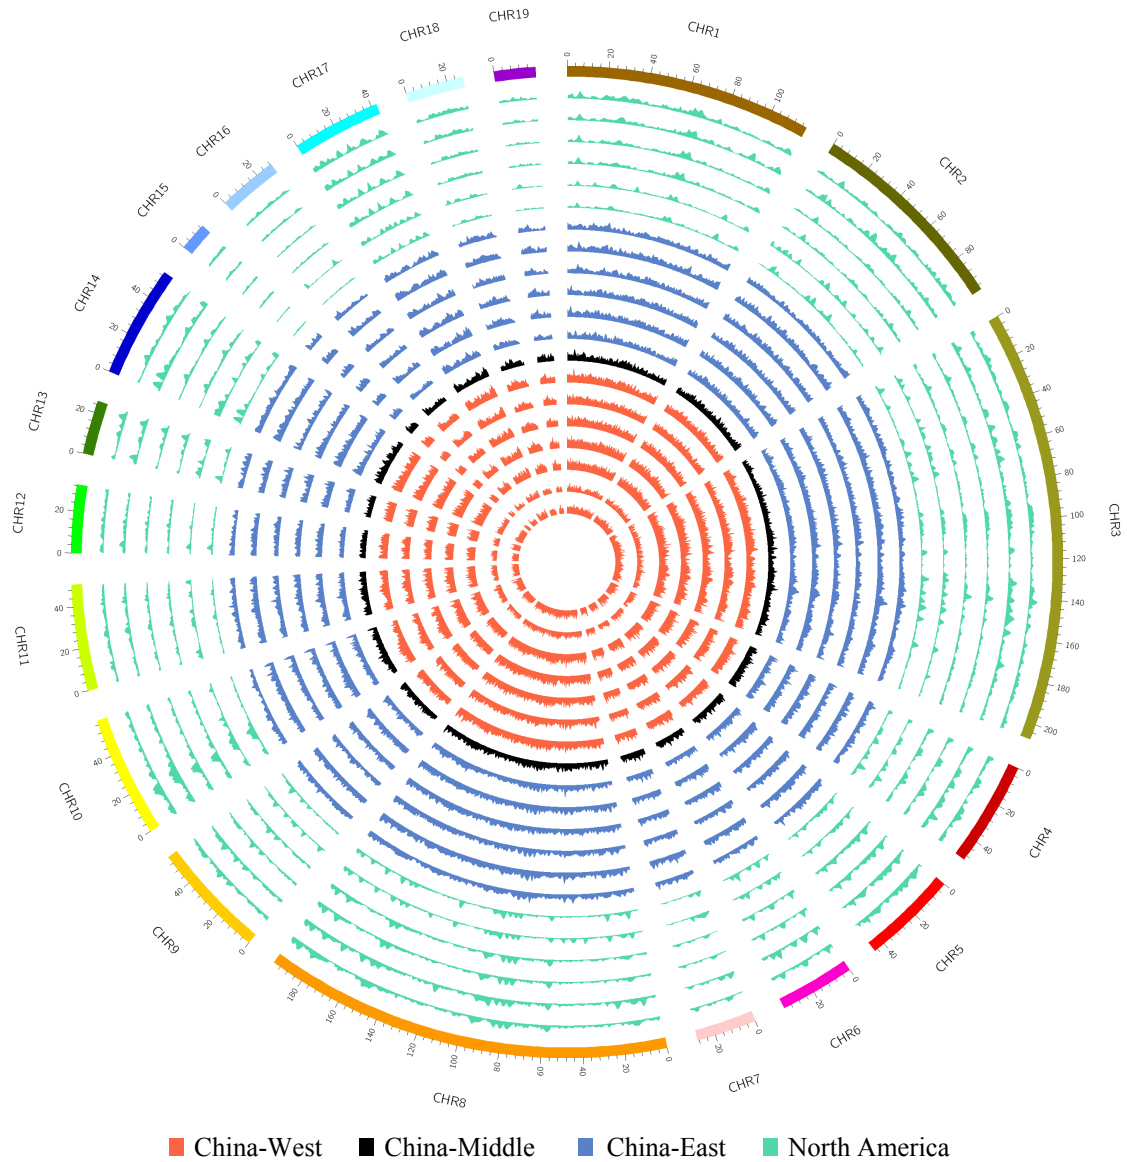

**Supplementary Figure 22. Overview of SNP distribution among 20 resequenced individuals.**

The 20 inner tracks depict SNP frequency distributions for 1-Mb non-overlapping windows in the seven *L. chinense* that came from Western China, one *L. chinense* that came from Central China, six *L. chinense* that came from Eastern China, and six *L. tuplifera* that came from North America.

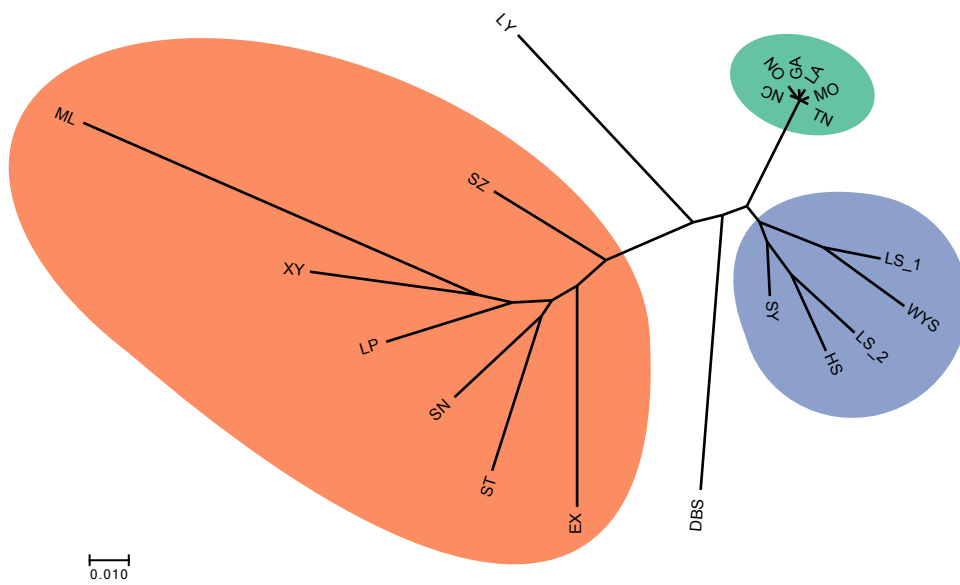

**Supplementary Figure 23. A SNP tree reconstructed using RAxML.**

The ML tree of all accessions constructed from whole-genome SNPs. Accessions coming from the same geographic areas are grouped together and colored corresponding to colors used in Figure 3.

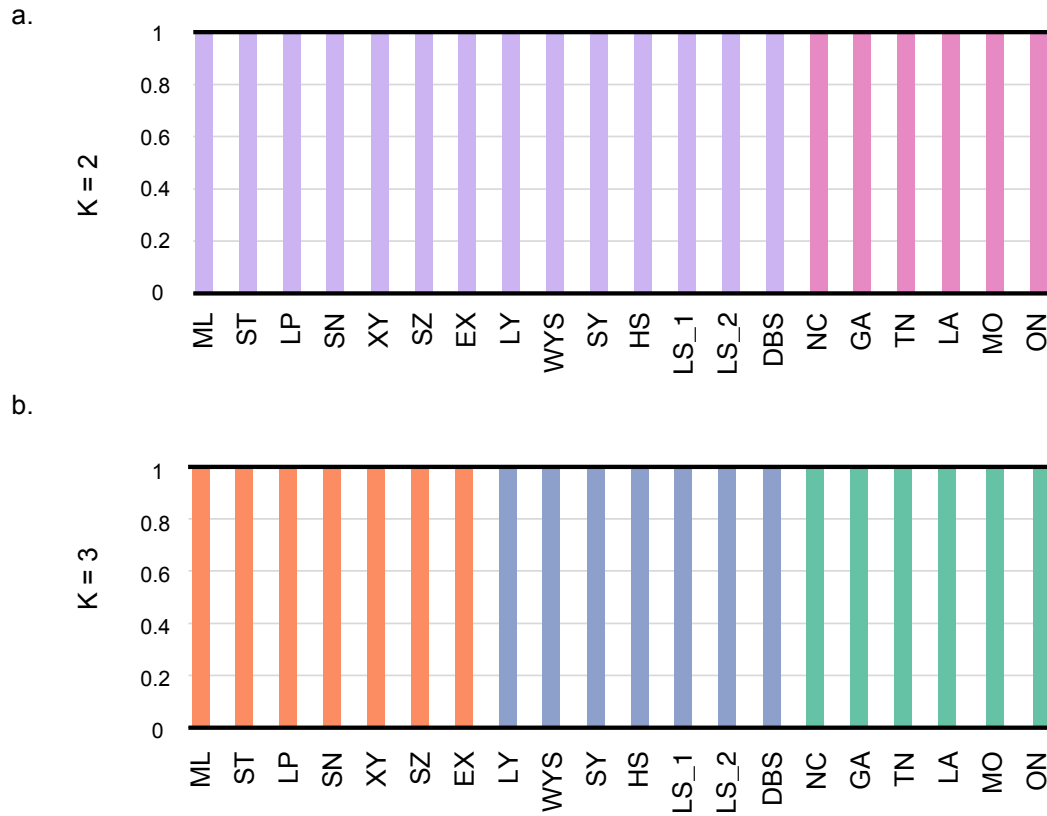

**Supplementary Figure 24. Population structure analysis.**

Varying the number of presumed ancestral populations ( $K$ ) showed that 20 *Liriodendron* resequenced individuals were divided into two groups, *L. chinense* and *L. tulipifera*, when  $K = 2$ , and three distinct groups when  $K = 3$  (b).

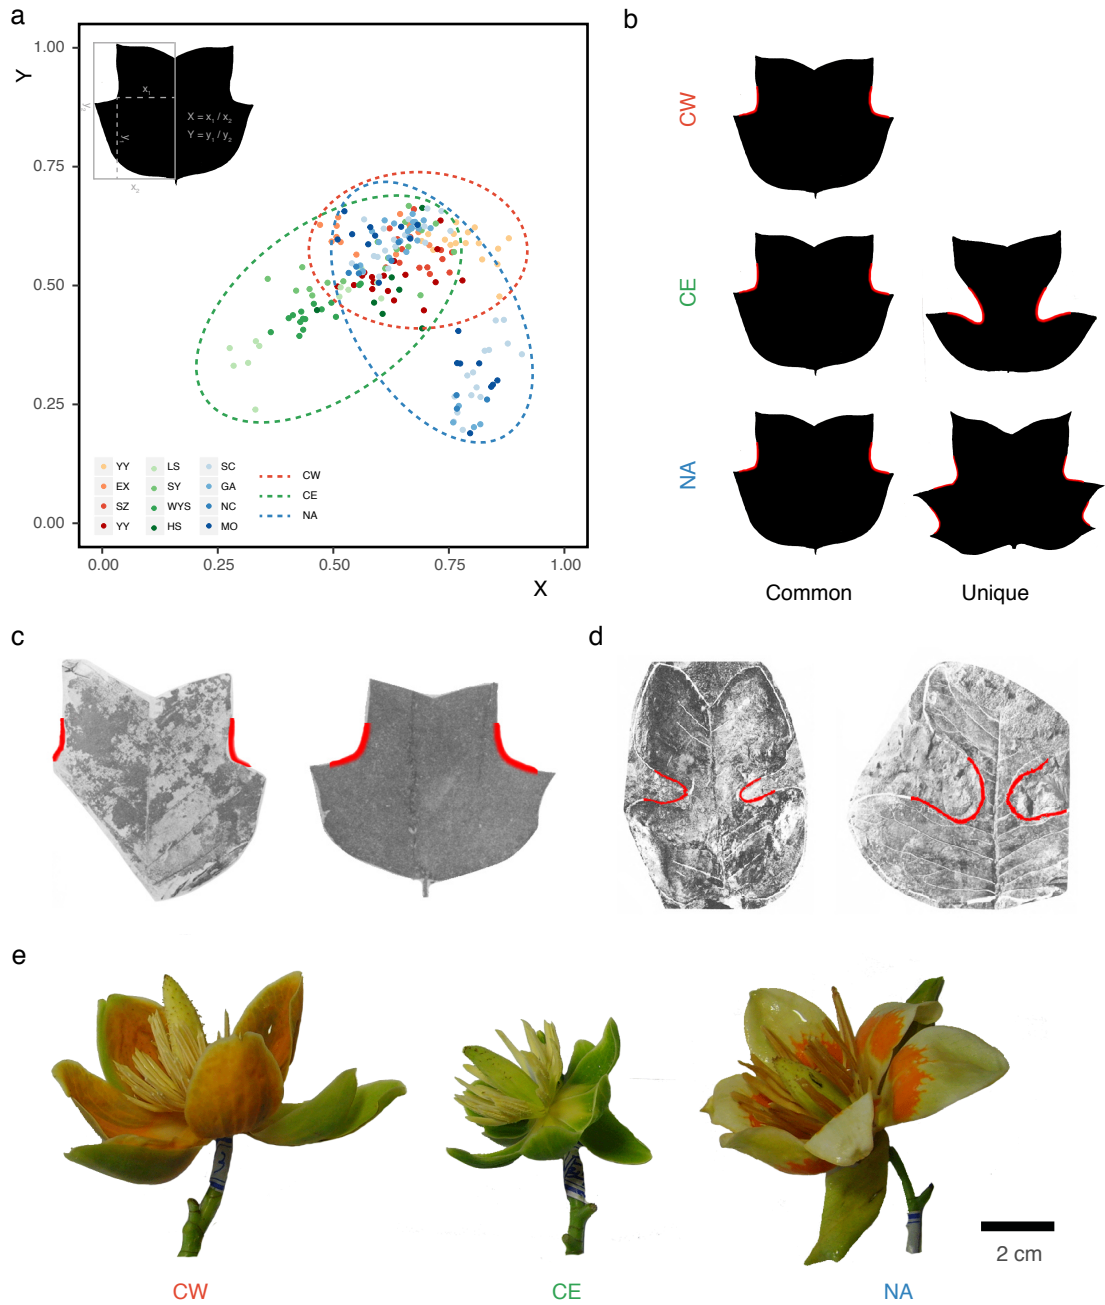

### Supplementary Figure 25. Phenotypic Analysis.

(a) The relative positions of the lateral sinus located in the left half of the leaf were plotted. The X-axis represents the ratio of the vertical distance from the lateral sinus to the primary vein ( $x_1$ ) to the vertical distance from the lateral lobe to the primary vein ( $x_2$ ). The Y-axis represents the ratio of the vertical distance from the lateral sinus to the leaf blade base ( $y_1$ ) to the vertical distance from the apical lobe to the leaf blade base ( $y_2$ ). (b) The representative leaf shapes of three groups were plotted respectively. (c) and (d) were the leaf shapes of two extinct *Liriodendron* species, *L. hesperia* and *L. giganteum*, respectively. (e) The representative mature floral organs of three *Liriodendron* groups. The experiment was repeated independently at least three times with similar results.

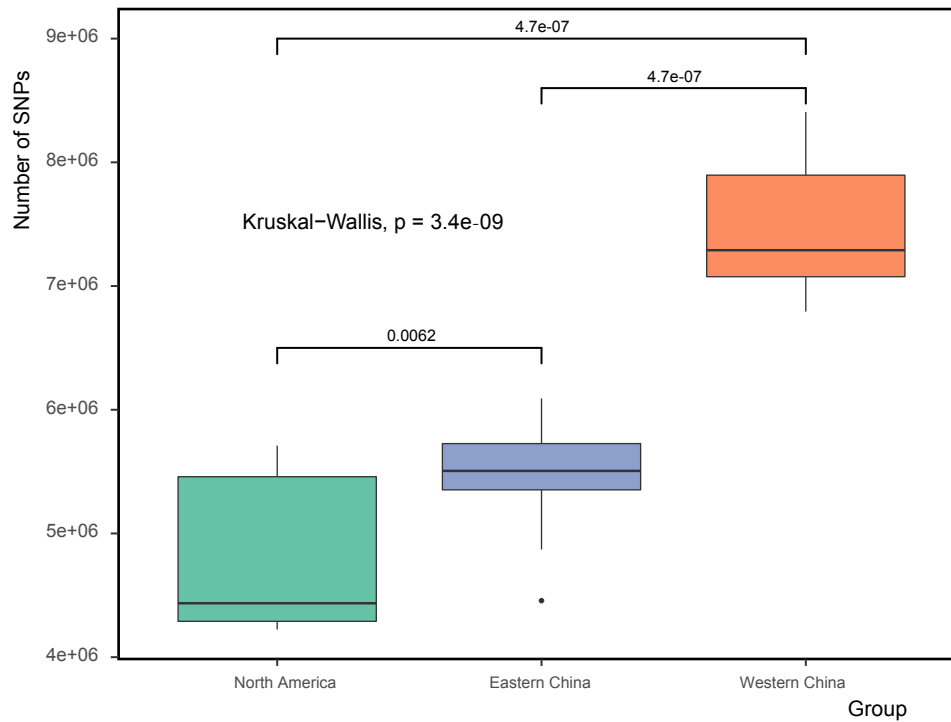

**Supplementary Figure 26. Individual differences within three *Liriodendron* groups.**

The X-axis represents the three *Liriodendron* groups supported by the SNP tree, PCA and structure analysis. Six, six, and seven individuals were separately included within these three groups from left to right. The Y-axis represents inter-individual SNPs within three groups. The number of inter-individual SNPs ranged from 4,224,002 to 5,710,354 with a mean value of 4,766,498 in the North America group, from 4,456,851 to 6,091,489 with a mean value of 5,485,145 in the Eastern China group, and from 6,793,165 to 8,407,025 with a mean value of 7,446,489 in the Western China group.

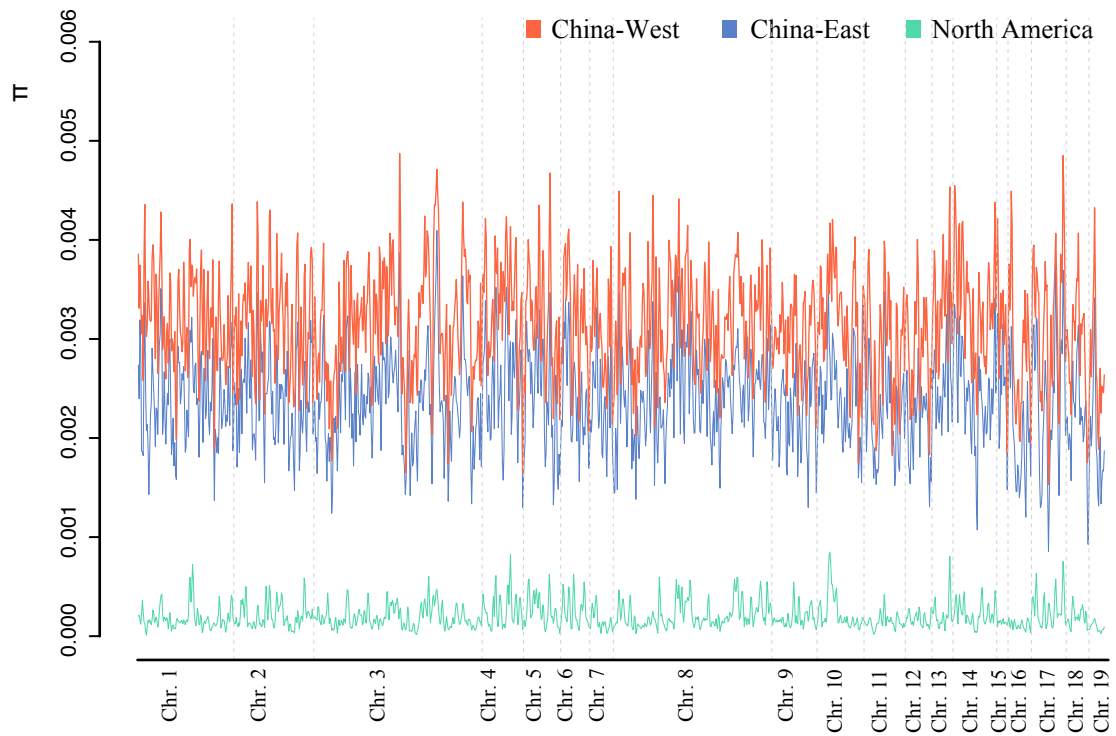

**Supplementary Figure 27. Distribution of  $\pi$  along 20 *Liriodendron* chromosomes.**

Distributions of  $\pi$  along 20 *Liriodendron* chromosomes among CW, CE and NA groups, respectively are plotted. These values are calculated in a 2-Mb sliding window with a 1-Mb step.
